29 predict and pre-empt behavioural errors due to lapses in attention and provides new insight into  
30 how vigilance decrements are reflected in information coding in the brain.

## 31 Introduction

32 When people monitor displays for rare targets, they are slower to respond and more likely to miss  
33 those targets relative to frequent target conditions (Wolfe et al., 2005; Warm et al., 2008; Rich et al.,  
34 2008). This effect is more pronounced as the time doing the task increases, which is often called a  
35 ‘vigilance decrement’. Theoretical accounts of vigilance decrements fall into two main categories.  
36 ‘Cognitive depletion’ theories suggest performance drops as cognitive resources are ‘used up’ by the  
37 difficulty of sustaining attention under vigilance conditions (Helton et al., 2008; Helton et al., 2011;  
38 Warm et al., 2008). In contrast, ‘mind wandering’ theories suggest that the boredom of the task  
39 tends to result in insufficient involvement of cognitive resources, which in turn leads to performance  
40 decrements (Manly et al., 1999; Smallwood et al., 2006; Young et al., 2002). Either way, there are  
41 many real-life situations where such a decrease in performance over time can lead to tragic  
42 consequences, such as the Paddington railway disaster (UK, 1999), in which a slow response time to  
43 a stop signal resulted in a train moving another 600 meters past the signal into the path of an  
44 oncoming train. With the move towards automated and semi-automated systems in many high-risk  
45 domains (e.g., power-generation and trains), humans now commonly need to monitor systems for  
46 infrequent computer failures or errors. These modern environments challenge our attentional  
47 systems and make it urgent to understand the way in which monitoring conditions change the way  
48 important information about the task is encoded in the human brain.

49  
50 To date, most vigilance and rare target studies have used simple displays with static stimuli.  
51 Traditional vigilance tasks, inspired by radar operators in WWII (Mackworth, 1948), require  
52 participants to respond to infrequent visual events on otherwise blank screens (Temple et al., 2000).

53 Contemporary vigilance tasks, like the Sustained Attention to Response Task (SART), require  
54 participants to respond frequently to a rapid stream of static displays and occasionally withhold a  
55 response (Rosvold et al., 1956; Rosenberg et al., 2013). However, modern environments (e.g., rail  
56 and air traffic control) have additional challenges not encapsulated by these measures. This includes  
57 multiple moving objects, potentially appearing at different times, and moving simultaneously in  
58 different directions. When an object moves in the space, its neural representation has to be  
59 continuously updated so we can perceive the object as having the same identity. Tracking moving  
60 objects also requires considerable neural computation: in addition to spatial remapping, for  
61 example, we need to predict direction, speed, and the distance of the object to a particular  
62 destination. These features cannot be studied using static stimuli; they require objects that shift  
63 across space over time. In addition, operators have complex displays requiring selection of some  
64 items while ignoring others. We therefore need new approaches to study vigilance decrements in  
65 situations that more closely resemble the real-life environments in which humans are now  
66 operating. Developing these methods will provide a new perspective on fundamental questions of  
67 how the brain implements sustained attention in moving displays, and the way in which monitoring  
68 compared with active task involvement changes the encoding of task information. These new  
69 methods may also provide avenues to optimise performance in high-risk monitoring environments.

70

71 The brain regions involved in maintaining attention over time has been studied using functional  
72 Magnetic Resonance Imaging (fMRI), which measures changes in cerebral blood flow (Adler et al.,  
73 2001; Benedict et al., 2002; Coull et al., 1996; Gilbert et al., 2006; Johannsen et al., 1997; Ortunoe t  
74 al., 2002; Perin et al., 2010; Schnell et al., 2007; Sturm et al., 1999; Tana et al., 2010; Thakral et al.,  
75 2009; Wingen et al., 2008). These studies compared brain activation in task vs. resting baseline or  
76 sensorimotor control (which involved no action) conditions and used univariate analyses to identify  
77 regions with higher activation under task conditions. This has the limitation that there are many

78 features that differ between the contrasted (subtracted) conditions, not just the matter of sustained  
79 attention. Specifically, this comparison cannot distinguish whether the activation during sustained  
80 attention is caused by the differences in the task, stimuli, responses or a combination of these  
81 factors. As it is challenging to get sufficient data from monitoring (vigilance) tasks in the scanner,  
82 many previous studies used tasks with relatively frequent targets, in which vigilance decrements  
83 usually do not occur. However, despite these challenges, Langner et al. (2013) reviewed vigilance  
84 neuroimaging studies and identified a network of right-lateralized brain regions including  
85 dorsomedial, mid- and ventrolateral prefrontal cortex, anterior insula, parietal and a few subcortical  
86 areas that they argue form the core network subserving vigilant attention in humans. The areas  
87 identified by Langner et al. (2013) show considerable overlap with a network previously identified as  
88 being recruited by many cognitively challenging tasks, the ‘multiple demand’ (MD) regions, which  
89 include the right inferior frontal gyrus, anterior insula and intra parietal sulcus (Duncan & Owen,  
90 2000; Duncan, 2010; Fedorenko et al., 2013; Woolgar et al., 2011; Woolgar et al., 2015a; Woolgar et  
91 al., 2015b).

92

93 Other fMRI studies of vigilance have focused on the default mode network, composed of discrete  
94 areas in the lateral and medial parietal, medial prefrontal, and medial and lateral temporal cortices  
95 such as posterior cingulate cortex (PCC) and ventral anterior cingulate cortex (vACC), which is  
96 thought to be active during ‘resting state’ and less active during tasks (Greicius et al., 2003; Greicius  
97 et al., 2009; Raichle et al., 2015). Eichele et al., (2008) suggested that lapses in attention can be  
98 predicted by decrease of deactivation of this default mode network. In contrast, Weissman et al.  
99 (2006) identified deactivation in the anterior cingulate and right prefrontal regions in pre-stimulus  
100 time windows when targets were missed. More recently, Sadaghiani et al. (2015) showed that the  
101 functional connectivity between sensory and ‘vigilance-related’ (Cingulo-Opercular) brain areas  
102 decreased prior to behavioural misses in an auditory task while the connectivity increased between

103 the same sensory area and the default-mode network. These suggest that modulation of  
104 interactions between sensory and vigilance-related brain areas might be responsible for behavioural  
105 misses in monitoring tasks.

106

107 Detecting changes in brain activation that correlate with lapses of attention can be particularly  
108 challenging with fMRI, given that it has poor temporal resolution. Electroencephalography (EEG),  
109 which records electrical activity at the scalp, has much better temporal resolution, and has been the  
110 other major approach for examining changes in brain activity during sustained attention tasks.

111 Frequency band analyses have shown that low-frequency alpha (8 to 10.9 Hz) oscillations predict  
112 task workload and performance during monitoring of simulated air traffic (static) displays with rare  
113 targets, while frontal theta band (4 to 7.9 Hz) activity predicts task workload only in later stages of  
114 the experiment (Kamzanova et al., 2014). Other studies find that increases in occipital alpha  
115 oscillations can predict upcoming error responses (Mazaheri et al., 2009) and misses (O'Connell et  
116 al., 2009) in go/no-go visual tasks with target frequencies of 11% and 9%, respectively. These  
117 changes in signal power that correlate with the task workload or behavioural outcome of trials are  
118 useful, but provide relatively coarse-level information about what changes in the brain during  
119 vigilance decrements.

120

121 Understanding the neural basis of decreases in performance over time under vigilance conditions is  
122 not just theoretically important, it also has potential real-world applications. In particular, if we  
123 could identify a reliable neural signature of attentional lapses, then we could potentially intervene  
124 prior to any overt error. For example, with the development of autonomous vehicles, being able to  
125 detect when a driver is not engaged, combined with information about a potential threat, could  
126 allow emergency braking procedures to be initiated. Previous studies have used physiological  
127 measures such as pupil size (Yoss, et al., 1970), body temperature (Molina et al., 2019), skin

128 conductance, blood pressure, etc. (Lohani et al., 2019) to indicate the level of human arousal or  
129 alertness, but these lack the fine-grained information necessary to distinguish transient dips from  
130 problematic levels of inattention in which task-related information is lost. In particular, we lack  
131 detail on how information processing changes in the brain during vigilance decrements. This  
132 knowledge is crucial to develop a greater theoretical and practical understanding of how humans  
133 sustain vigilance.

134

135 In this study, we developed a new task, multiple object monitoring (MOM), which includes key  
136 features of real-life situations confronting human operators in high-risk environments. These  
137 features include moving objects, varying levels of target frequency, and a requirement to detect and  
138 avoid collisions. We recorded neural data using the highly-sensitive method of  
139 magnetoencephalography (Baillet, 2017) and used multivariate pattern analyses (MVPA) to detect  
140 changes in information encoded in the brain. We used these new approaches to better understand  
141 the way in which changes between active and monitoring tasks affects neural processing, including  
142 functional connectivity. We then examined the potential for using these neural measures to predict  
143 forthcoming behavioural misses based on brain activity.

144

## 145 [Methods](#)

### 146 [Participants:](#)

147 We tested twenty-one right-handed participants (10 male, 11 female, mean age = 23.4 years (SD =  
148 4.7 years), all Macquarie University students) with normal or corrected to normal vision. The Human  
149 Research Ethics Committee of Macquarie University approved the experimental protocols and the  
150 participants gave informed consent before participating in the experiment. We reimbursed each

151 participant AU\$40 for their time completing the MEG experiment, which lasted for about 2 hours  
152 including setup.

153

154

## 155 Apparatus:

156 We recorded neural activity using a whole-head MEG system (KIT, Kanazawa, Japan) with 160 coaxial  
157 first-order gradiometers, at a sampling rate of 1000 Hz. We projected the visual stimuli onto a mirror  
158 at a distance of 113 cm above participants' heads while they were in the MEG. An InFocus IN5108  
159 LCD back projection system (InFocus, Portland, Oregon, USA), located outside the magnetically  
160 shielded room, presented the dynamically moving stimuli, controlled by a desktop computer  
161 (Windows 10; Core i5 CPU; 16 GB RAM; NVIDIA GeForce GTX 1060 6GB Graphics Card) using  
162 MATLAB with Psychtoolbox 3.0 extension (Brainard, 1997; Kleiner et al., 2007). We set the refresh  
163 rate of the projector at 60 Hz and used parallel port triggers and a photodiode to mark the beginning  
164 (dot appearing on the screen) and end (dot disappearing off the screen) of each trial. We recorded  
165 participant's head shape using a pen digitizer (Polhemus Fastrack, Colchester, VT) and placed five  
166 marker coils on the head which allowed the location of the head in the MEG helmet to be monitored  
167 during the recording- we checked head location at the beginning, half way through and the end of  
168 recording. We used a fibre optic response pad (fORP, Current Designs, Philadelphia, PA, USA) to  
169 collect responses and an EyeLink 1000 MEG-compatible remote eye-tracking system (SR Research,  
170 1000 Hz monocular sampling rate) to record eye position. We focused the eye-tracker on the right  
171 eye of the participant and calibrated the eye-tracker immediately before the start of MEG data  
172 recording.

173

174 Task and Stimuli:

175 *Task summary:* The task was to avoid collisions of relevant moving dots with the central object by  
176 pressing the space bar if the dot passed a deflection point in a visible predicted trajectory without  
177 changing direction to avoid the central object (see Figure 1A; a demo can be found here  
178 <https://osf.io/c6hy9/>). A text cue at the start of each block indicated which colour of dot was  
179 relevant for that block. The participant only needed to respond to targets in this colour; dots in the  
180 other colour formed distractors. Pressing the button deflected the dot in one of two possible  
181 directions (counterbalanced) to avoid collision.

182

183 *Stimuli:* The stimuli were moving dots in one of two colours that followed visible trajectories and  
184 covered a visual area of  $3.8 \times 5$  degrees of visual angle (dva; Figure 1A). We presented the stimuli in  
185 blocks of 110 s duration, with at least one dot moving on the screen at all times during the 110s  
186 block. The trajectories directed the moving dots from two corners of the screen (top left and bottom  
187 right) straight towards a centrally presented static “object” (a white dot of 0.25 dva) and then  
188 deflected away (either towards the top right or bottom left of the screen; in pathways orthogonal to  
189 their *direction of approach*) from the static object at a set distance (the deflection point).

190

191 Target dots deviated from the visible trajectory at the deflection point and continued moving  
192 towards the central object. The participant had to push the space bar to prevent a ‘collision’. If the  
193 response was made before the dot reached the centre of the object, the dot deflected, and this was  
194 counted as a ‘hit’. If the response came after this point, the dot continued straight, and this was  
195 counted as a ‘miss’, even if they pressed the button before the dot totally passed through central  
196 object.

197



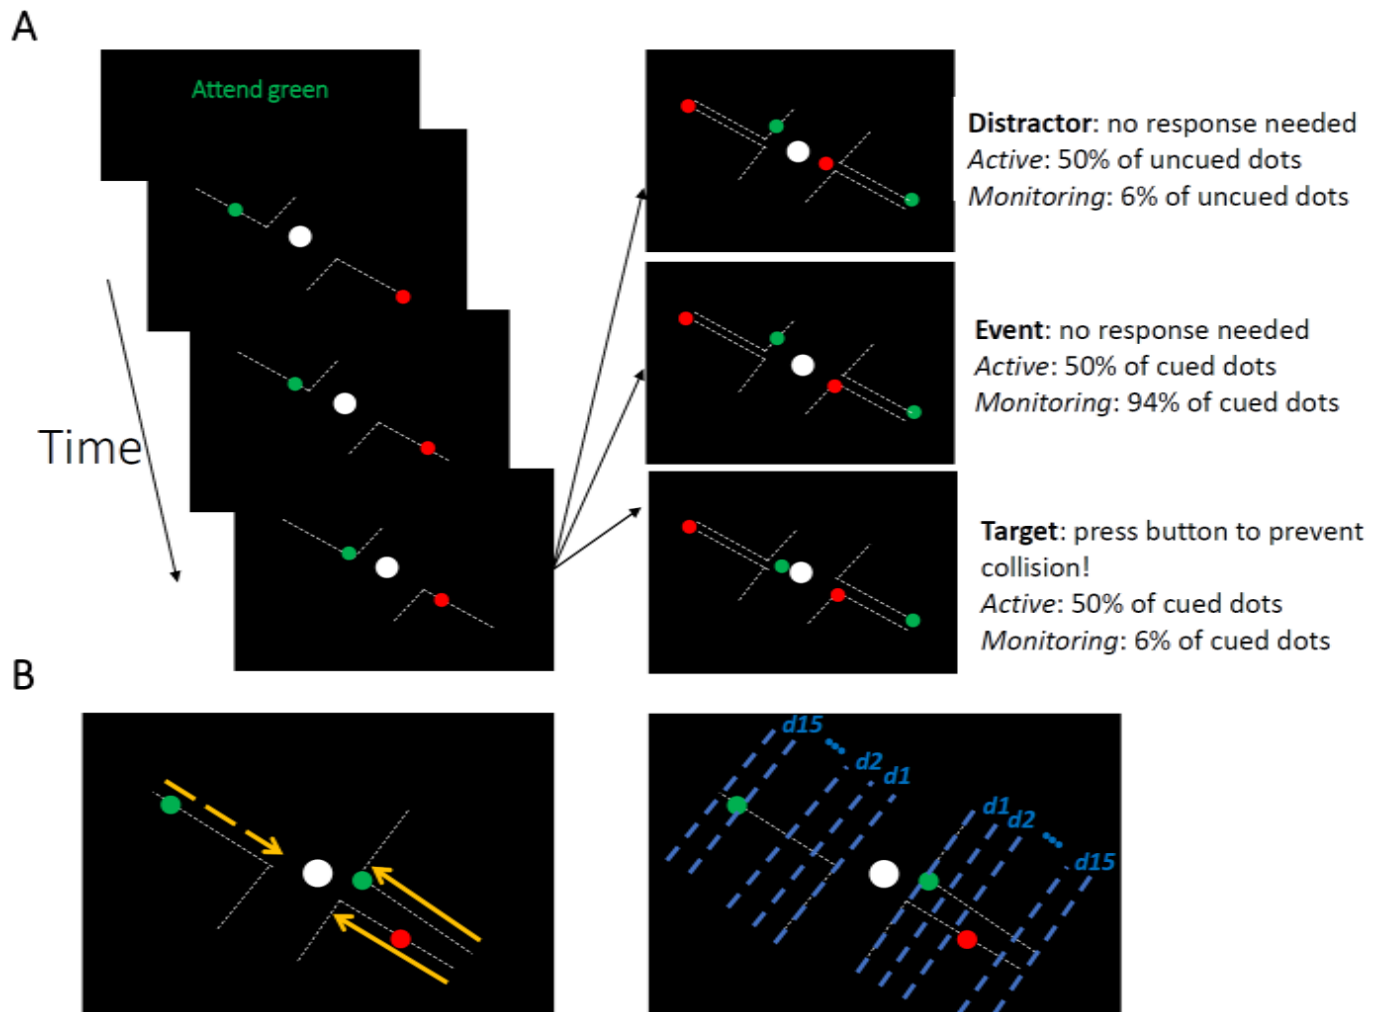

Figure 1. The Multiple Object Monitoring (MOM) task and types of information decoded. (A) At the start of a block, the relevant colour is cued (here, green; distractors in red). Over the on-task period (~30 mins per task condition), multiple dots entered from either direction, each moving along a visible individual trajectory towards the middle object. Only attended dots that failed to deflect along the trajectories at the deflection point required a response (Target: bottom right display). Participants did not need to press the button for the unattended dot (Distractor: top right display) and the dots that kept moving on the trajectories (Event: middle right panel). Each dot took ~1226 ms from appearance to deflection. (B) Direction of approach information (left display: left vs. right as indicated by dashed and solid lines, respectively) and distance information (right display). Note the blue dashed lines and orange arrows were not present in the actual display. A demo of the task can be found here [<https://osf.io/c6hv9/l>].

198

199 The time from dot onset in the periphery to the point of deflection was  $1226 \pm 10$  (Mean  $\pm$  SD)  
 200 milliseconds. Target (and distractor event) dots took  $410 \pm 10$  (Mean  $\pm$  SD) milliseconds to cross from  
 201 the deflection point to the collision point. In total, each dot moved across the display for  $2005 \pm 12$   
 202 (Mean  $\pm$  SD) milliseconds before starting to fade away after either deflection or travel through the  
 203 object. The time delay between the onsets of different dots (ISI) was  $1660 \pm 890$  (Mean  $\pm$  SD)

204 milliseconds. There were 1920 dots presented in the whole experiment (~56 mins). Each 110 second  
205 block contained 64 dots, 32 (50%) in red and 32 (50%) in green, while the central static object and  
206 trajectories were presented in white on a black background.

207

208 *Conditions:* There were two target frequency conditions. In ‘Monitoring’ blocks, target dots were  
209 ~6.2% of cued-colour dots (2 out of 32 dots). In ‘Active’ blocks, target dots were 50% of cued-colour  
210 dots (16 out of 32 dots). The same proportion of dots in the non-cued colour failed to deflect; these  
211 were distractors (see Figure 1A, top right panel). Participants completed two practice blocks of the  
212 Active condition and then completed 30 blocks in the main experiment (15 Active followed by 15  
213 Monitoring or *vice versa*, counterbalanced across participants).

214

215 The time between the appearance of target dots varied unpredictably, with distractors and  
216 correctly-deflecting dots (events) intervening. In Monitoring blocks, there was an average time  
217 between targets of 57.88 ( $\pm 36.03$  SD) seconds. In Active blocks, there was an average time between  
218 targets of 7.20 ( $\pm 6.36$  SD) seconds.

219

220 *Feedback:* On target trials, if the participant pressed the space bar in time, this ‘hit’ was indicated by  
221 a specific tone and deflection of the target dot. There were three types of potential false alarm, all  
222 indicated by an error tone and no change in the trajectory of the dot. These were if the participant  
223 responded: (1) too early, while the dot was still on the trajectory; (2) when the dot was not a target  
224 and had been deflected automatically (‘event’ in Figure 1A, middle right); or (3) when the dot was in  
225 the non-cued colour (‘distractor’ in Figure 1A, top right) in any situation. Participants had only one  
226 chance to respond per dot; any additional responses resulted in ‘error’ tones. As multiple dots could

227 be on the screen, we always associated the button press to the dot which was closest to the central  
228 object.

229

### 230 Pre-processing:

231 MEG data were filtered online using band-pass filters in the range of 0.03 to 200 Hz and notch-  
232 filtered at 50 Hz. We did not perform eye-blink artefact removal because it has been shown that  
233 blink artefacts are successfully ignored by multivariate classifiers as long as they are not  
234 systematically different between decoded conditions (Grootswagers et al., 2017). We then imported  
235 the data into Matlab and epoched them from -100 to 3000 ms relative to the trial onset time. Finally,  
236 we down-sampled the data to 200 Hz for the decoding of our two key measures: *direction of*  
237 *approach* and *distance to object* (see below).

238

### 239 Multivariate pattern analyses (MVPA):

240 We measured the information contained in the multivariate (multi-sensor) patterns of MEG data by  
241 training a linear discriminant analysis (LDA) classifier using a set of training trials from two categories  
242 (e.g., for the *direction of approach* measure, this was dots approaching from left vs. right, see  
243 below). We then tested to see whether the classifier could predict the category of an independent  
244 (left-out) set of testing data from the same participant. We used a 10-fold cross-validation approach,  
245 splitting the data into training and testing subsets. Specifically, we trained the LDA classifier on 90%  
246 of the trials and tested it on the left-out 10% of the trials. This procedure was repeated 10 times  
247 each time leaving out a different 10% subset of the data for testing (i.e., 10-fold cross validation).

248

249 We decoded two major task features from the neural data: (1) the *direction of approach* (left vs.  
250 right); and (2) the distance of each moving dot from the centrally fixed object (*distance to object*),

251 which correspond to visual (retinal) information changing over time. Our interest was in the effect of  
252 selective attention (attended vs. unattended) and Target Frequency conditions (Active vs.  
253 Monitoring) on the neural representation of this information, and how the representation of  
254 information changed on trials when participants missed the target.

255

256 We decoded left vs. right *directions of approach* (as indicated by yellow arrows in Figure 1B) every 5  
257 ms starting from 100 ms before the appearance of the dot on the screen to 3000 ms later. Please  
258 note that as each moving dot is considered a trial, trial time windows (epochs) overlapped for 62.2%  
259 of trials. In Monitoring blocks, 1.2% of target trials overlapped (two targets were on the screen  
260 simultaneously but lagged relative to one another). In Active blocks, 17.1% of target trials  
261 overlapped.

262

263 For the decoding of *distance to object*, we split the trials into the time windows corresponding to 15  
264 equally spaced distances of the moving dot relative to the central object (as indicated by blue lines in  
265 Figure 1B), with distance 1 being closest to the object, and 15 being furthest away (the dot having  
266 just appeared on the screen). Next, we collapsed (concatenated) the MEG signals from identical  
267 distances (splits) across both sides of the screen (left and right), so that every distance included data  
268 from dots approaching from both left and right side of the screen. This concatenation ensures that  
269 distance information decoding is not affected by the *direction of approach*. Finally, we trained and  
270 tested a classifier to distinguish between the MEG signals (a vector comprising data from all MEG  
271 sensors, concatenated over all time points in the relevant time window), pertaining to each pair of  
272 distances (e.g., 1 vs. 2) using a leave-one-out cross-validation procedure. We obtained classification  
273 accuracy for all possible pairs of distances (105 combinations of 15 distances). To obtain a single  
274 decoding value per distance, we averaged the 14 classification values that corresponded to that  
275 distance against other 14 distances. For example, the final decoding accuracy for distance 15 was an

276 average of 15 vs. 14, 15 vs. 13, 15 vs. 12 and so on until 15 vs. 1. We repeated this procedure for our  
277 main Target Frequency conditions (Active vs. Monitoring), Attention conditions (attended vs.  
278 unattended) and Time on Task (first and last five blocks of each task condition, which are called early  
279 and late blocks here, respectively). This was done separately for *correct* and *miss* trials and for each  
280 participant separately.

281

### 282 [Informational connectivity analysis:](#)

283 To evaluate possible modulations of brain connectivity between the attentional networks of the  
284 frontal brain and the occipital visual areas, we used a simplified version of our recently developed  
285 RSA-based connectivity analysis (Goddard et al., 2016; Karimi-Rouzbahani, 2018; Karimi-Rouzbahani  
286 et al., 2019). Specifically, we evaluated the informational connectivity, which measures the similarity  
287 of distance information between areas, across our main Target Frequency conditions (Active vs.  
288 Monitoring), Attention conditions (attended vs. unattended) and Time on Task (first and last five  
289 blocks of each task condition, which are called early and late blocks here, respectively). This was  
290 separately done for *correct* and *miss* trials, using representational dissimilarity matrices (RDM;  
291 Kriegeskorte et al., 2008). To construct the RDMs, we decoded all possible combinations of distances  
292 from each other yielding a 15 by 15 cross-condition classification matrix, for each condition  
293 separately. We obtained these matrices from peri-occipital and peri-frontal areas to see how the  
294 manipulation of Attention, Target Frequency and Time on Task modulated the correlation of  
295 information (RDMs) between those areas on *correct* and *miss* trials. We quantified connectivity using  
296 Spearman's rank correlation of the matrices obtained from those areas, only including the lower  
297 triangle of the RDMs (105 decoding values). To avoid bias when comparing the connectivity on  
298 *correct* vs. *miss* trials, the number of trials were equalized by subsampling the *correct* trials to the  
299 number of *miss* trials and repeating the subsampling 100 times before finally averaging them for  
300 comparison with *miss* trials.

### 301 Error data analysis:

302 Next, we asked what information was coded in the brain when participants missed targets. To study  
303 information coding in the brain on *miss* trials, where the participants failed to press the button when  
304 targets failed to automatically deflect, we used our recently-developed method of error data  
305 analysis (Woolgar et al., 2019). Essentially, this analysis asks whether the brain represents the  
306 information similarly on *correct* and *miss* trials. For that purpose, we trained a classifier using the  
307 neural data from a proportion of *correct* trials (i.e., when the target dot was detected and manually  
308 deflected punctually) and tested on both the left-out portion of the *correct* trials (i.e., cross-  
309 validation) and on the *miss* trials. If decoding accuracy is equal between the *correct* and *miss* trials,  
310 we can conclude that information coding is maintained on *miss* trials as it is on *correct* trials.  
311 However, if decoding accuracy is lower on *miss* trials than on *correct* trials, we can infer that  
312 information coding differs on *miss* trials, consistent with the change in behaviour. Since *correct* and  
313 *miss* trials were visually different after the deflection point, we only used data from before the  
314 deflection point.

315

316 For these error data analyses, the number of folds for cross-validation were determined based on  
317 the proportion of *miss* to *correct* trials (number of folds = number of miss trials/number of correct  
318 trials). This allowed us to test the trained classifiers with equal numbers of *miss* and *correct* trials to  
319 avoid bias in the comparison.

320

### 321 Predicting behavioural performance from neural data:

322 We developed a new method to predict, based on the most task-relevant information in the neural  
323 signal, whether or not a participant would press the button for a target dot in time to deflect it on a  
324 particular trial. This method includes three steps, with the third step being slightly different for the

325 left-out testing participant vs. the other 20 participants. First, for every participant, we trained 105  
326 classifiers using ~80% of correct trials to discriminate the 15 distances. Second, we tested those  
327 classifiers using half of the left-out portion (~10%) of the correct trials, which we called validation  
328 trials, by simultaneously accumulating (i.e., including in averaging) the accuracies of the classifiers at  
329 each distance and further distances as the validation dot approached the central object. The  
330 validation set allowed us to determine a decision threshold for predicting the outcome of each  
331 testing trial: whether it was a *correct* or *miss* trial. Third, we performed a second-level classification  
332 on testing trials which were the other half (~10%) of the left-out portion of the correct trials and the  
333 miss trials, using each dot's accumulated accuracy calculated as in the previous step. Accordingly, if  
334 the testing dot's accumulated accuracy was **higher** than the decision threshold, it was predicted as  
335 *correct*, otherwise *miss*. For all participants, except for the left-out testing one, the decision  
336 threshold was chosen from a range of **multiples** (0.1 to 4 in steps of 0.1) of the standard deviation  
337 below the accumulated accuracy obtained for the validation set on the second step. For determining  
338 the optimal threshold for the testing participant, however, instead of a range of multiples, we used  
339 the average of the best performing multiples (i.e., the one which predicted the behavioural outcome  
340 of the trial more accurately) obtained from the other 20 participants. This avoided circularity in the  
341 analysis.

342

343 To give more detail on the second and third steps, when the validation/testing dots were at distance  
344 #15, we averaged the accuracies of the 14 classifiers trained to classify dots at distance #15 from all  
345 other distances. Accordingly, when the dot reached distance #14, we also included and averaged  
346 accuracies from classifiers which were trained to classify distance #14 from all other distances  
347 leading to 27 classifier accuracies. Therefore, by the time the dot reached distance #1, we had 105  
348 classifier accuracies to average and predict the behavioural outcome of the trial. Every classifier's  
349 accuracies were either 1 or 0 corresponding to correct or incorrect classification of dot's distance,

350 respectively. Note that accumulation of classifiers' accuracies, as compared to using classifier  
351 accuracy on every distance independently, provides a more robust and smoother classification  
352 measure for deciding on the label of the trials. The validation set, which was different from the  
353 testing set, allowed us to set the decision threshold based on the validation data within each subject  
354 and from the 20 participants and finally test our prediction classifiers on a separate testing set from  
355 the 21<sup>st</sup> individual participant, iteratively. The optimal threshold was 1.54 ( $\pm$  0.2) times the SD below  
356 the decoding accuracy on the validation set across participants.

357

### 358 [Eye-tracking data analysis:](#)

359 To see if we could use a less complicated physiological measure to obtain information about the  
360 processing of visual information, and to check that the decoding we observed was not just due to  
361 eye movements, we repeated the above decoding analyses using the eye-tracking data. Specifically,  
362 instead of the MEG sensor data, we decoded the information about the *direction of approach* and  
363 *distance to object* using x-y coordinates of the right eye fixation provided by the eye-tracker. All  
364 other aspects of the analysis were identical to the 'error data analysis' section. If we observe a  
365 similar decoding of information using the eye-tracking data, it would mean that we could use eye-  
366 tracking, which is a less expensive and more feasible approach for prediction of errors, instead of  
367 MEG. If the prediction from the MEG decoding was stronger than that of the eye tracking, it would  
368 mean that there was information in the neural signal over and above any artefact associated with  
369 eye movement.

370

### 371 [Statistical analyses:](#)

372 To determine the evidence for the null and the alternative hypotheses, we used Bayes analyses as  
373 implemented by Krekelberg (<https://klabhub.github.io/bayesFactor/>) based on Rouder et al. (2012).



374 We used standard rules for interpreting levels of evidence (Lee and Wagenmakers, 2014; Dienes,  
375 2014): Bayes factors of  $>10$  and  $<1/10$  were interpreted as strong evidence for the alternative and  
376 null hypotheses, respectively, and  $>3$  and  $<1/3$  were interpreted as moderate evidence for the  
377 alternative and null hypotheses, respectively. We interpreted the Bayes factors which fell between 3  
378 and  $1/3$  as reflecting insufficient evidence either way.

379

380 Specifically, for the behavioural data, we asked whether there was a difference between Active and  
381 Monitoring conditions in terms of miss rates and reaction times. Accordingly, we calculated the  
382 Bayes factor as the probability of the data under alternative (i.e., difference) relative to the null (i.e.,  
383 no difference) hypothesis in each block separately. In the decoding, we repeated the same  
384 procedure to evaluate the evidence for the alternative hypothesis of a difference between decoding  
385 accuracies across conditions (e.g. Active vs. Monitoring and Attended vs. Unattended) vs. the null  
386 hypothesis of no difference between them, at every time point/distance. To evaluate evidence for  
387 the alternative of above-chance decoding accuracy vs. the null hypothesis of no difference from  
388 chance, we calculated the Bayes factor between the distribution of actual accuracies obtained and a  
389 set of 1000 random accuracies obtained by randomising the class labels across the same pair of  
390 conditions (null distribution) at every time point/distance.

391

392 To evaluate the evidence for the alternative of main effects of different factors (Attention, Target  
393 Frequency and Time on Task) in decoding, we used Bayes factor ANOVA (Rouder et al., 2012). This  
394 analysis evaluates the evidence for the null and alternative hypothesis as the ratio of the Bayes  
395 factor for the full model ANOVA (i.e., including all three factors of Target Frequency, Attention and  
396 the Time on Task) relative to the restricted model (i.e., including the two other factors while  
397 excluding the factor being evaluated). For example, for evaluating the main effect of Time on Task,

398 the restricted model included Attention and Target Frequency factors but excluded the factor of  
399 Time on Task.

400

401 The priors for all Bayes factor analyses were determined based on Jeffrey-Zellner-Siow priors  
402 (Jeffreys, 1961; Zellner and Siow, 1980) which are from the Cauchy distribution based on the effect  
403 size that is initially calculated in the algorithm using a *t*-test (Rouder et al., 2012). The priors are  
404 data-driven and have been shown to be invariant with respect to linear transformations of  
405 measurement units (Rouder et al., 2012), which reduces the chance of being biased towards the null  
406 or alternative hypotheses.

407

## 408 Results

### 409 Behavioural data: The MOM task evokes a reliable vigilance decrement

410 In the first 110 second experimental block of trials (i.e., excluding the two practice blocks),  
411 participants missed 29% of targets in the Active condition and 40% of targets in the Monitoring  
412 condition. However, the number of targets in any single block is necessarily very low for monitoring  
413 conditions (for a single block, there are 16 targets for Active but only 2 targets for Monitoring). The  
414 pattern does become more robust over blocks, and Figure 2A shows the miss rates changed over  
415 time in different directions for the Active vs. Monitoring conditions. For Active blocks, miss rates  
416 decreased over the first five blocks and then plateaued at ~17%. For Monitoring, however, miss  
417 rates increased throughout the experiment: by the final block, these miss rates were up to 76% (but  
418 again, the low number of targets in Monitoring mean that we should use caution in interpreting the  
419 results of any single block alone). There was evidence that miss rates were higher in the Monitoring  
420 than Active conditions from the 4th block onwards ( $BF > 3$ ; Figure 2A). Participants' reaction times  
421 (RTs) on correct trials also showed evidence of vigilance decrements, increasing over time under

422 Monitoring but decreasing under Active task conditions (Figure 2B). There was evidence that  
 423 reaction times were slower for Monitoring compared with Active from the sixth block onwards (BF >  
 424 3, except for Block #11). The characteristic pattern of increasing miss rates and slower RTs over time  
 425 in the Monitoring relative to the Active condition validates the MOM task as effectively evoking  
 426 vigilance decrements.

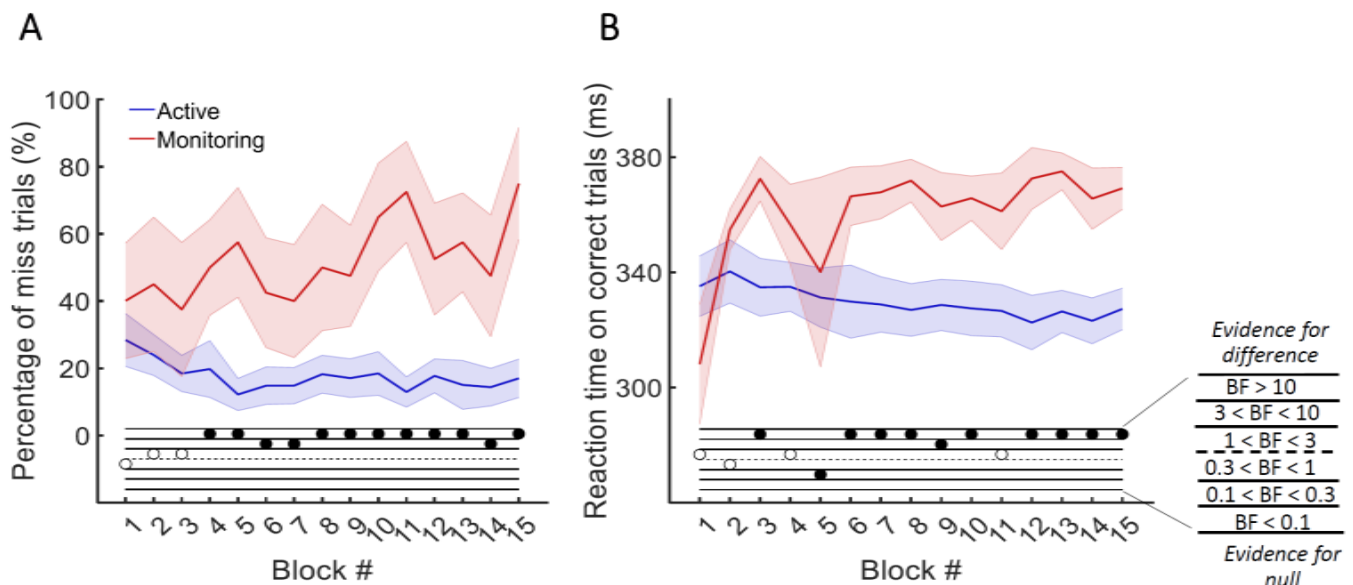

Figure 2. Behavioural performance on the MOM task. The percentage of *miss* trials (A), and *correct* reaction times (B), as a function of block. Thick lines show the average across participants (shading 95% confidence intervals) for Active (blue) and Monitoring (red) conditions. Each block lasted for 110 seconds and had either 16 (Active) or 2 (Monitoring) targets out of 32 cued-colour and 32 non-cued colour dots. Bayes Factors are shown in the bottom section of each graph: Filled circles show moderate/strong evidence for either hypothesis and empty circles indicate insufficient evidence when evaluating the contrast between Active and Monitoring conditions.

427

## 428 Neural data: Decoding different aspects of task-related information

429 With so much going on in the display at one time, we first needed to verify that we can successfully  
 430 decode the major aspects of the moving stimuli, relative to chance. The full data figures and details  
 431 are presented in Supplementary Materials: We were able to decode both *direction of approach* and  
 432 *distance to object* relative to chance from MEG signals (see Supplementary Figure 1). Thus, we can  
 433 turn to our main question about how these representations were affected by the Target Frequency,  
 434 Attention and Time on Task.

435

## 436 The neural correlates of the vigilance decrement

437 As the behavioural results showed (Figure 2), the difference between Active and Monitoring  
438 conditions increased over time, showing the greatest difference during the final blocks of the  
439 experiment. To explore the neural correlates of these vigilance decrements, we evaluated  
440 information processing in the brain during the first five and last five blocks of each task (called early  
441 and late blocks, respectively) and the interactions between the Target Frequency, Attention and the  
442 Time on Task using a 3-way Bayes factor ANOVA as explained in *Methods*.

443

## 444 Effects of Target Frequency on *direction of approach* information

445 *Direction of approach* information is a very clear visual signal ('from the left' vs 'from the right') and  
446 therefore is unlikely to be strongly modulated by other factors, except perhaps whether the dot was  
447 in the cued colour (Attended) or the distractor colour (could be ignored: Unattended). There was  
448 strong evidence for a main effect of Attention (Figure 3A;  $BF > 10$ , Bayes factor ANOVA, cyan dots)  
449 starting from 265ms and lasting until dots faded. This is consistent with maintenance of information  
450 about the attended dots and attenuation of the information about unattended dots (Supplementary  
451 Figure 1A). The large difference in coding attributable to attention remained for as long as the dots  
452 were visible.

453

454 In contrast, there was no sustained main effect of Target Frequency on the same *direction of*  
455 *approach* coding ( $0.1 < BF < 0.3$ ; Bayes factor ANOVA, Figure 3A, pink dots). For the majority of the  
456 epoch there was moderate evidence for the null hypothesis ( $BF < 1/3$ ). The sporadic time points with  
457 a main effect of Target Frequency, observed a few times before the deflection ( $3 < BF < 10$ ), likely  
458 reflect noise in the data as there is no clustering. Recall that we only focus on timepoints prior to

459 deflection, as after this point there are visual differences between Active and Monitoring, with more  
 460 dots deflecting in the Monitoring condition.

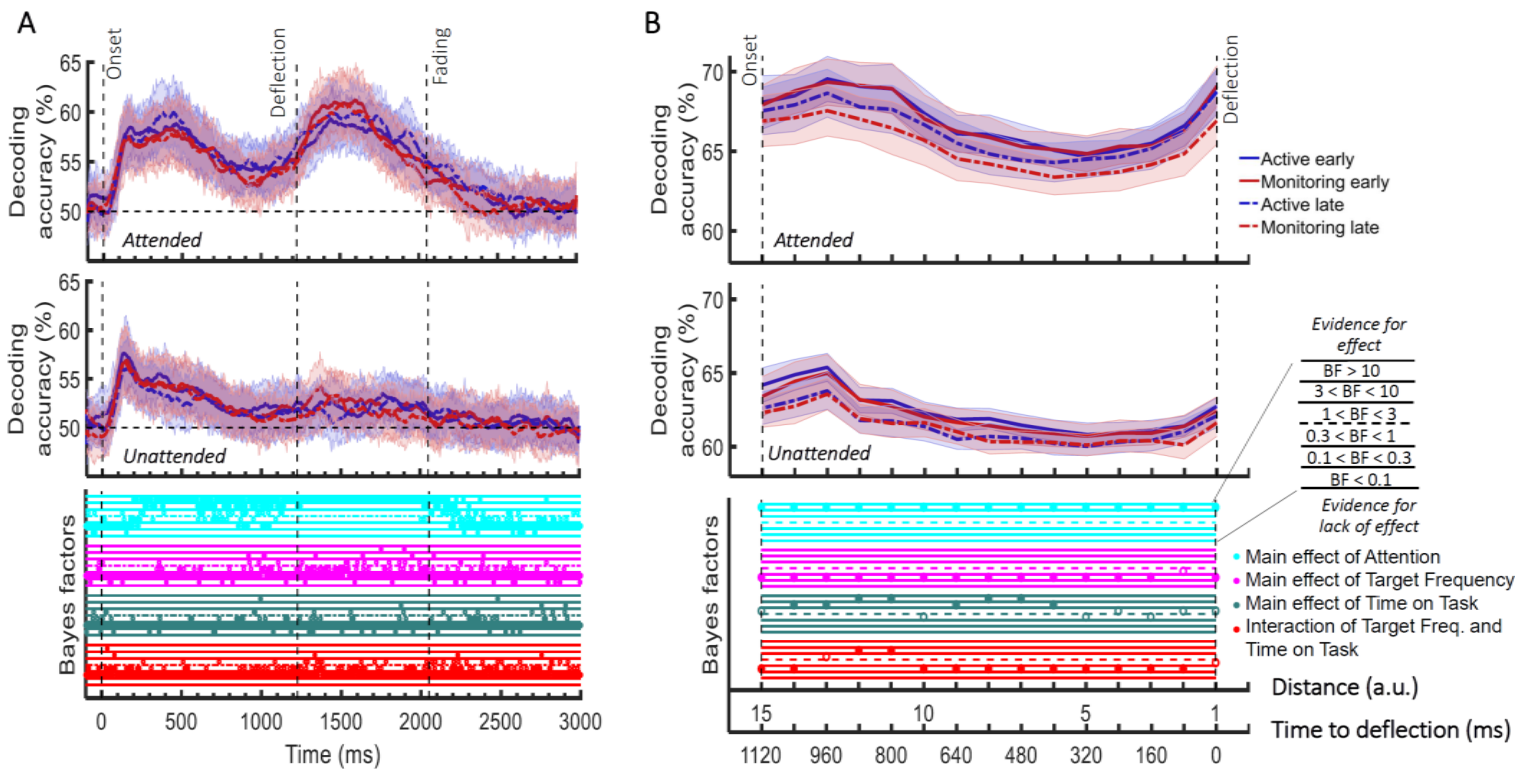

Figure 3. Impact of different conditions and their interactions on information processing on *correct* trials (all trials except those in which a target was missed or there was a false alarm). (A) Decoding of *direction of approach* information (less task-relevant). The horizontal dashed line refers to theoretical chance-level decoding (50%). Upper graph: Attended dot; Lower graph: Unattended ('distractor') dot. (B) Decoding of *distance to object* information (most task-relevant) and their Bayesian evidence for main effects and interactions. Thick lines show the average across participants (shading 95% confidence intervals). Vertical dashed lines indicate critical times in the trial. Bayes Factors are shown in the bottom section of each graph: Filled circles show moderate/strong evidence for either hypothesis and empty circles indicate insufficient evidence. Main effects and interactions of conditions calculated using Bayes factor ANOVA analysis. Cyan, pink, green and red dots indicate the main effects of Attention, Target frequency, Time on Task and the interaction between Target frequency and Time on Task, respectively. The results of Bayes factor analysis (i.e. the main effects of the three conditions and their interactions) are from the same 3-way ANOVA analysis and therefore identical for attended and unattended panels. Early = data from the first 5 blocks (~10 minutes). Late = data from the last 5 blocks (~10 minutes).

461

462 There was also no sustained main effect of the Time on Task on information about the *direction of*  
 463 *approach* ( $0.1 < BF < 0.3$ ; Bayes factor ANOVA, green dots; Figure 3A). There were no sustained 2-  
 464 way or 3-way interactions between Attention, Target Frequency and Time on Task ( $BF < 1$ ; Bayes

465 factor ANOVA). Note that the number of trials used in the training and testing of the classifiers were  
466 equalized across the 8 conditions and equalled the minimum available number of trials across those  
467 conditions shown in Figure 3. Therefore, the observed effects cannot be attributed to a difference in  
468 the number of trials across conditions.

469

#### 470 *Effects of Target Frequency on critical distance to object information*

471 The same analysis for the representation of the task-relevant *distance to object* information showed  
472 strong evidence for a main effect of Attention ( $BF > 10$ ; Bayes factor ANOVA) at all 15 distances,  
473 moderate or strong evidence for a main effect of Time on Task ( $BF > 3$ ; Bayes factor ANOVA) at eight  
474 of the earlier distances, and an interaction between Time on Task and Target Frequency at two of  
475 these distances (Figure 3B). There was more decoding for attended than unattended dots (compare  
476 top and bottom panels of Figure 3B). The main effect of Time on Task reflected decreased decoding  
477 in later blocks (compare dashed lines to solid lines in Figure 3B). Finally, the interaction between  
478 Target Frequency and Time on Task can be seen when comparing the solid to the dashed lines in  
479 blue and red colours, separately, and suggests a bigger decline in decoding in Monitoring compared  
480 to Active conditions. Note that as there was moderate evidence for no interaction between  
481 Attention and Target Frequency or between Attention and Time on Task ( $0.1 < BF < 0.3$ , 2-way Bayes  
482 factor ANOVA) or simultaneously between the three factors ( $BF < 0.1$ , 3-way Bayes factor ANOVA),  
483 we do not show those statistical results in the figure.

484

485 Together, these results suggest that while vigilance conditions had little or no impact on coding of  
486 the *direction of approach*, they did impact the critically task-relevant information about the distance  
487 of the dot from the object. Coding of this information declined as the time on the task increased and  
488 this effect was more pronounced when the target events happened infrequently.

489

## 490 [Is brain connectivity modulated by Attention, Target Frequency and the Time on Task?](#)

491 Using graph-theory-based univariate connectivity analysis, it has been recently shown that the  
492 connectivity between relevant sensory areas and “vigilance-related” cognitive areas changes prior to  
493 lapses in attention (behavioural misses; Sadaghiani et al., 2015). Therefore, we asked whether  
494 vigilance decrements across the time course of our task corresponded to changes in multi-variate  
495 connectivity, which tracks information transfer, between frontal attentional networks and sensory  
496 visual areas. Specifically, we asked whether there were changes in *information exchange* between  
497 these conditions. We used a simplified version of our method of RSA-based informational  
498 connectivity to evaluate the (Spearman’s rank) correlation between distance information RDMs  
499 across the peri-frontal and peri-occipital electrodes (see *Methods*; Goddard et al., 2016; Figure 4A).

500

501 Results showed strong evidence (Bayes factor ANOVA,  $BF = 6.3e^{21}$ ) for higher informational  
502 connectivity for Attended compared to Unattended trials, and moderate evidence for higher  
503 connectivity in Active compared to Monitoring conditions (Bayes factor ANOVA,  $BF = 3.4$ ; Figure 4B).  
504 There was insufficient evidence to determine whether there was a main effect of Time on Task  
505 (Bayes factor ANOVA,  $BF = 0.83$ ). There was moderate evidence for no 2-way and 3-way interactions  
506 between the three factors (Bayes factor ANOVA, 2-way Time on Task-Target Frequency:  $BF = 0.17$ ;  
507 Time on Task-Attention:  $BF = 0.16$ ; Target Frequency-Attention:  $BF = 0.15$ ; their 3-way interactions  
508  $BF = 0.12$ ). These results suggest that Monitoring conditions and trials in which the dots are in the  
509 distractor (unattended) colour, in which the attentional load is low, result in less informational  
510 connectivity between occipital and frontal brain areas compared to Active conditions and attended  
511 trials, respectively. This is consistent with a previous study (Alnaes et al., 2015), which suggested  
512 that large-scale functional brain connectivity depends on the attentional load, and might underpin or  
513 accompany the decrease in information decoding across the brain in these conditions (Figure 3B).



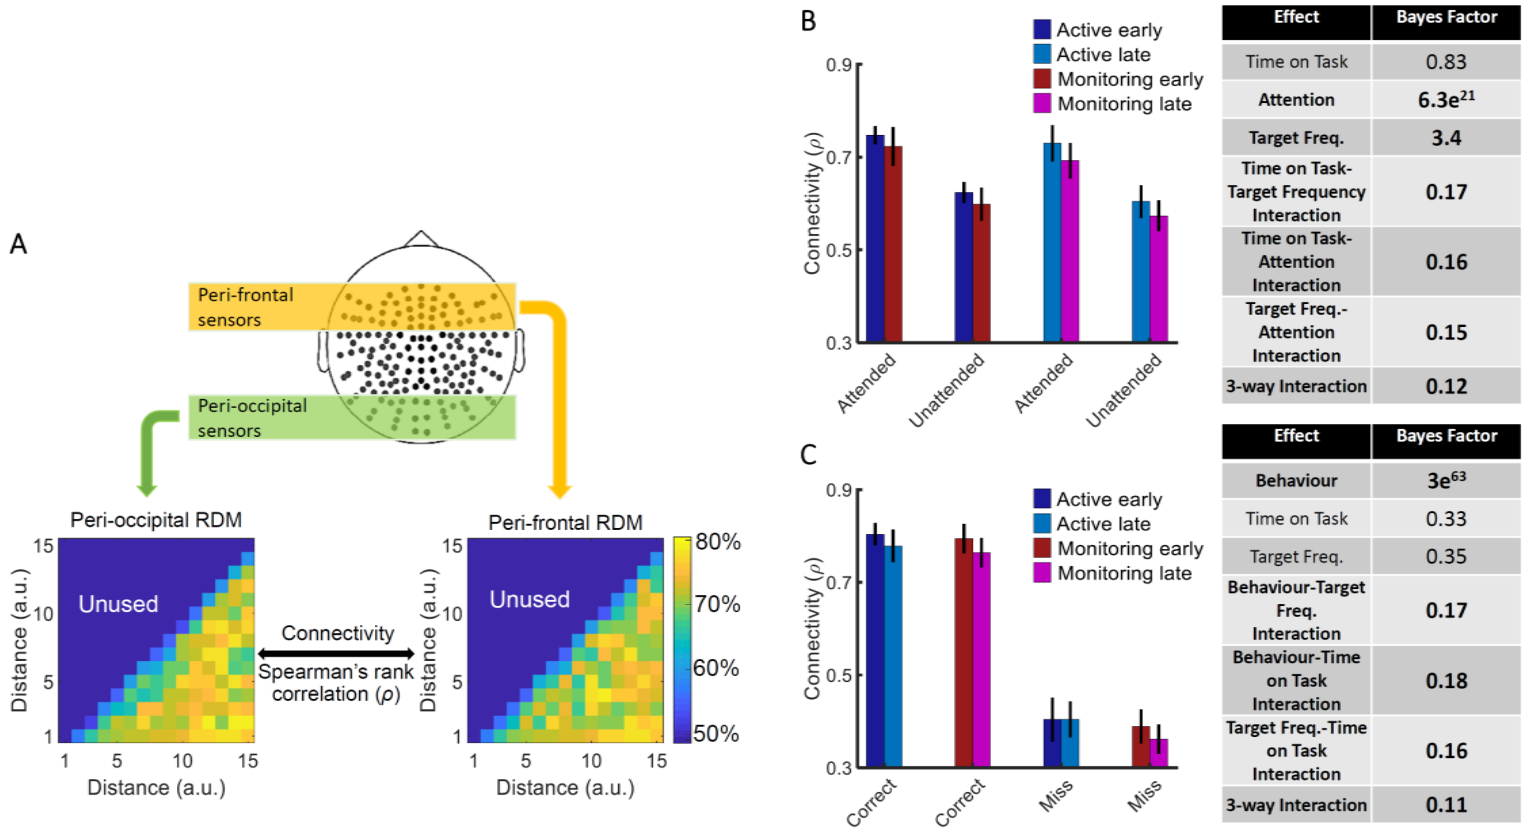

Figure 4. Relationship between informational connectivity and Attention, Target Frequency, Time on Task and the behavioural outcome of the trial (i.e., correct vs. miss). (A) Calculation of connectivity using Spearman's rank correlation between RDMs obtained from the peri-frontal and peri-occipital sensors as indicated by colored boxes, respectively. RDMs include decoding accuracies obtained from testing the 105 classifiers trained to discriminate different *distance to object* categories. (B) Connectivity values for the eight different conditions of the task and the results of three-way Bayes factor ANOVA with factors Time on Task (early, late), Attention (attended, unattended) and Target Frequency (active, monitoring), using only correct trials. (C) Connectivity values for the Active and Monitoring, Early and Late blocks of each task for *correct* and *miss* trials (attended condition only) and the result of Bayes factor ANOVA with factors Target Frequency (Active, Monitoring), Time on Task (early, late) and behavioural outcome (correct, miss) as inputs. Number of trials are equalized across conditions in B and C separately. Bars show the average across participants (error bars 95% confidence intervals). Bold fonts indicate moderate or strong evidence for either the effect or the null hypothesis.

514

515 We also compared the connectivity for the correct vs. miss trials (Figure 4C). This analysis was

516 performed only for attended condition as there are no miss trials for unattended condition, by

517 definition. There was strong evidence for less (almost half) connectivity on *miss* compared to *correct*

518 trials (Bayes factor ANOVA,  $BF = 3e^{63}$ ). There was insufficient evidence to determine the effects of

519 the Time on Task or Target Frequency (Bayes factor ANOVA,  $BF = 0.33$  and  $BF = 0.35$ , respectively)

520 and moderate evidence for a lack of 2-way and 3-way interactions between the three factors (Bayes



521 factor ANOVA, Behaviour-Target Frequency: BF = 0.17; Behaviour-Time on Task: BF = 0.18; Target  
522 Frequency-Time on Task: BF = 0.16; their 3-way interactions BF = 0.11). Weaker connectivity  
523 between occipital and frontal areas could have led to the behavioural misses observed in this study  
524 (Figure 1) as was previously reported in an auditory monitoring task using univariate graph-theoretic  
525 connectivity analyses (Sadaghiani et al., 2015), although, of course, these are correlational data and  
526 so we cannot make any strong causal inferences. These results cannot be explained by the number  
527 of trials as they are equalized across the 8 conditions in each of the analyses separately.

528

529 [Can we use the neural data to predict behavioural errors before they occur?](#)

530 [Is neural information processing different on \*miss\* trials?](#)

531 The results presented in Figure 3, which used only *correct* trials, showed changes due to target  
532 frequency to the representation of task-relevant information when the task was performed  
533 successfully. We next move on to our second question, which is whether these neural  
534 representations change when overt behaviour *is* affected, and therefore, whether we can use the  
535 neural activity as measured by MEG to predict behavioural errors before they occur. We used our  
536 method of error data analysis (Woolgar et al., 2019) to examine whether the patterns of information  
537 coding on miss trials differed from correct trials (see *Methods*). For these analyses we used only  
538 attended dots, as unattended dots do not have behavioural responses, and we matched the total  
539 number of trials in our implementation of correct and miss classification.

540

541 First, we evaluated the processing of the less relevant information - the *direction of approach*  
542 measure (Figure 5A). The results for *correct* trials provided information dynamics very similar to the  
543 attended condition in Figure 3A, except for higher overall decoding, which is explained by the

544 inclusion of the data from the whole experiment (15 blocks) rather than just the five early and late  
 545 blocks (note the number of trials is still matched to miss trials).

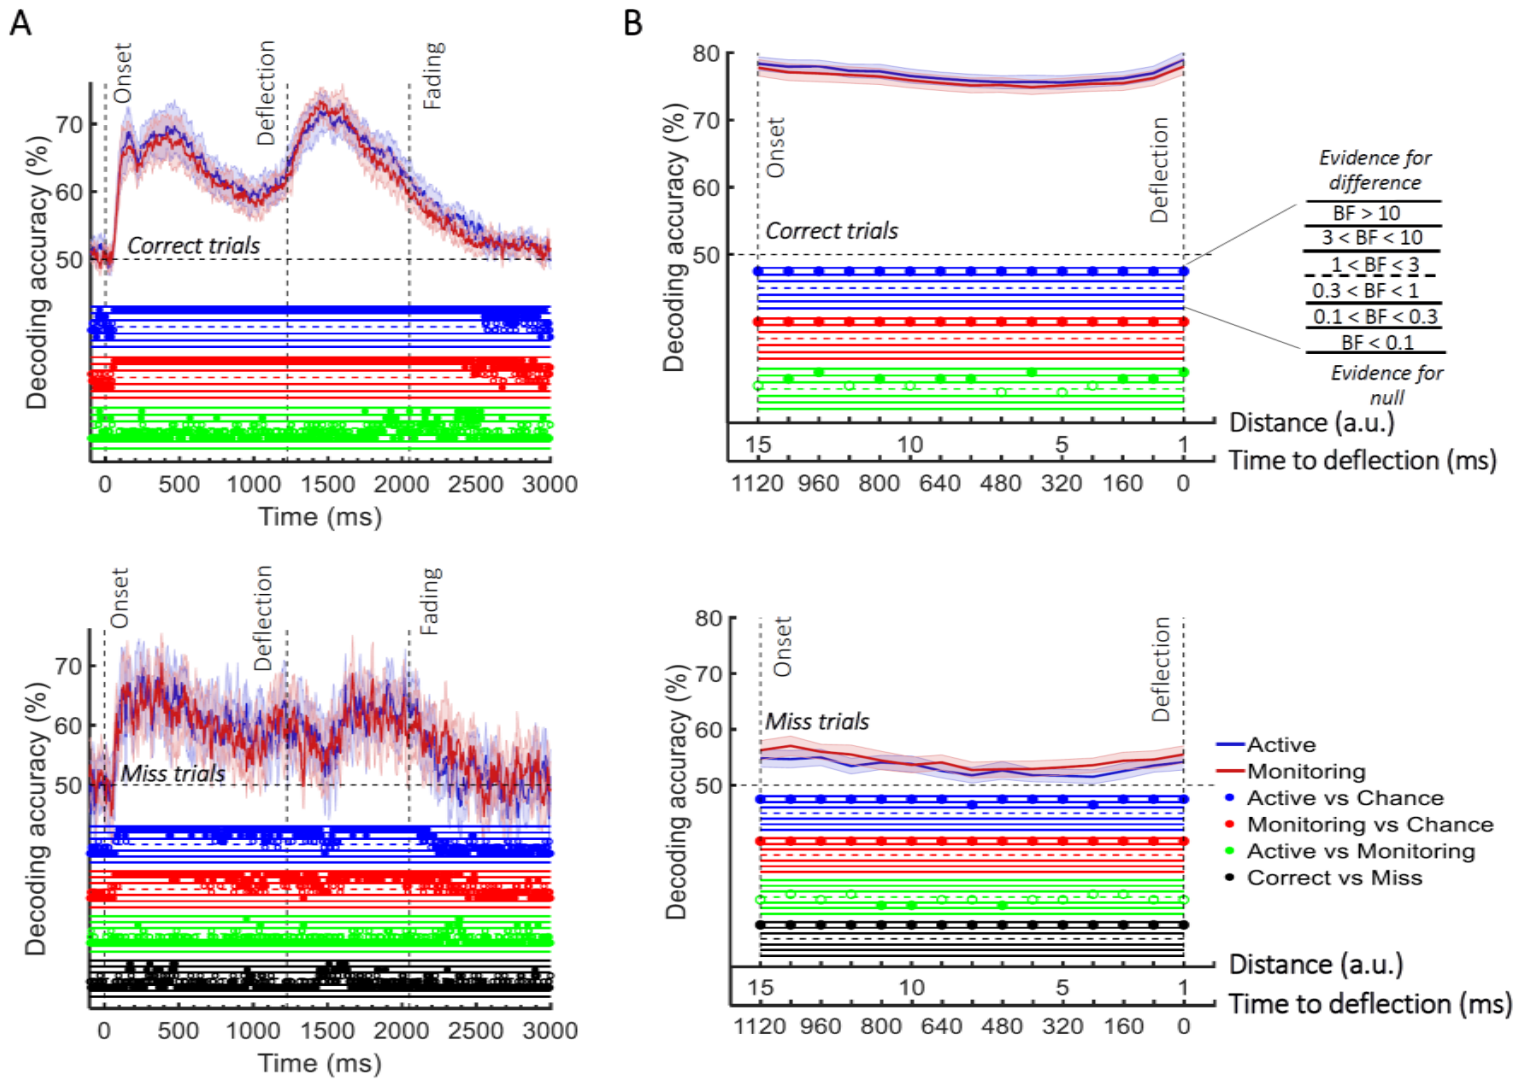

Figure 5. Decoding of information on *correct* vs. *miss* trials. (A) Decoding of *direction of approach* information (less task-relevant). (B) Decoding of *distance to object* information (most task-relevant). The horizontal dashed lines refer to chance-level decoding. Top panels: Decoding using correct trials; Bottom panels: Decoding using miss trials. In both top and bottom panels, the classifiers were trained on *correct* trials and tested on (left out) *correct* and all *miss* trials, respectively. Thick lines show the average across participants (shading 95% confidence intervals). Vertical dashed lines indicate critical events in the trial. Bayes Factors are shown in the bottom section of each graph: Filled circles show moderate/strong evidence for either hypothesis and empty circles indicate insufficient evidence. They show the results of Bayes factor analysis when evaluating the difference of the decoding values from chance for Active (blue) and Monitoring (red) conditions separately, the comparison of the two conditions (green) and the comparison of correct and miss trials (black). Note that for the comparison of correct and miss trials, Active and Monitoring conditions were averaged separately.

546

547 Active and Monitoring conditions did not show any time windows of sustained difference ( $BF < 0.3$ ).  
548 However, when the classifiers were tested on *miss* trials, from onset to deflection, the pattern of  
549 information dynamics were different, even though we had matched the number of trials.  
550 Specifically, while the level of information was comparable to *correct* trials with spurious instances  
551 (but no sustained time windows) of difference ( $BF > 3$  as indicated by black dots) before 500 ms,  
552 decoding traces were much noisier for *miss* trials with more variation across trials and between  
553 nearby time points (Figure 5A). Note that after the deflection, the visual signal is different for correct  
554 and miss trials, so the difference between their decoding curves ( $BF > 3$ ) is not meaningful. These  
555 results suggest a noisier processing of *direction of approach* information for the missed dots  
556 compared to correctly deflected dots.

557

558 We then repeated the same procedure on the processing of the most task-relevant *distance to*  
559 *object* information on *correct* vs. *miss* trials (Figure 5B). Although on *correct* trials, the distance  
560 information for both Active and Monitoring conditions was well above chance (77%;  $BF > 10$ ), for  
561 *miss* trials, the corresponding distance information was only just above chance (55%;  $BF > 10$  for all  
562 distances except one). The direct comparison revealed that distance information dropped  
563 considerably on *miss* trials compared to *correct* trials (Figure 5; Black dots;  $BF > 10$  across all  
564 distances; Active and Monitoring results were averaged for correct and miss trials separately before  
565 Bayes analyses). This is consistent with less representation of the crucial information about the  
566 distance from the object preceding a behavioural miss.

567

568 [Can we predict behavioural errors using neuroimaging?](#)

569 Finally, we asked whether we could use this information to predict the behavioural outcome of each  
570 trial. To do so, we developed a new method that classified trials based on their behavioural  
571 outcomes (correct vs. miss) by asking how well a set of classifiers, pre-trained on correct trials,

572 would classify the distance of the dot from the target (see *Methods*; Figure 6A). To achieve this, we  
573 used a second-level classifier which labelled a trial as correct or miss based on the average  
574 accumulated accuracies obtained for that dot at every distance from the first-level decoding  
575 classifiers which were trained on *correct* trials (Figure 6A and 6B; see *Methods*). If the accumulated  
576 accuracy for the given dot at the given distance was less than the average accuracy obtained from  
577 testing on the validation set minus a specific threshold (based on standard deviation), the testing dot  
578 (trial) was labelled as *correct*, otherwise *miss*. As Figure 6B shows, there was strong evidence ( $BF >$   
579  $10$ ) that decoding accuracy of distances was higher for *correct* than *miss* trials with the inclusion of  
580 more classifier accuracies as the dot approached from the corner of the screen towards the centre  
581 with a multiple of around 1.5 as threshold (Figure 6C). This clear separation of accumulated  
582 accuracies for *correct* vs. *miss* trials allowed us to predict with above-chance accuracy the  
583 behavioural outcome of the ongoing trial (Figure 6D). To find the optimal threshold for each  
584 participant, we evaluated the thresholds used for all other participants except for a single testing  
585 participant for whom we used the average of the best thresholds that led to highest prediction  
586 accuracy for other participants. This was  $\sim 1.5$  standard deviation below the average accuracy on the  
587 other participants' validation (correct trial) sets (Figure 6C).

588

589 The prediction accuracy of behavioural outcome was above chance level (68% vs. 50%;  $BF > 10$ ) even  
590 when the dot had only been on the screen for 80ms, which corresponds to our furthest distance #15  
591 (1200ms prior to deflection point; Figure 6D). The accuracy increased to 85% as the dot approached  
592 the centre of the screen, with  $\sim 80\%$  accuracy with still 800 ms to go before required response.  
593 Importantly, the prediction algorithm showed generalisable results across participants; the threshold  
594 for decision obtained from the other participants could predict the accuracy of an independent  
595 participant's behaviour using only their neural data.

596

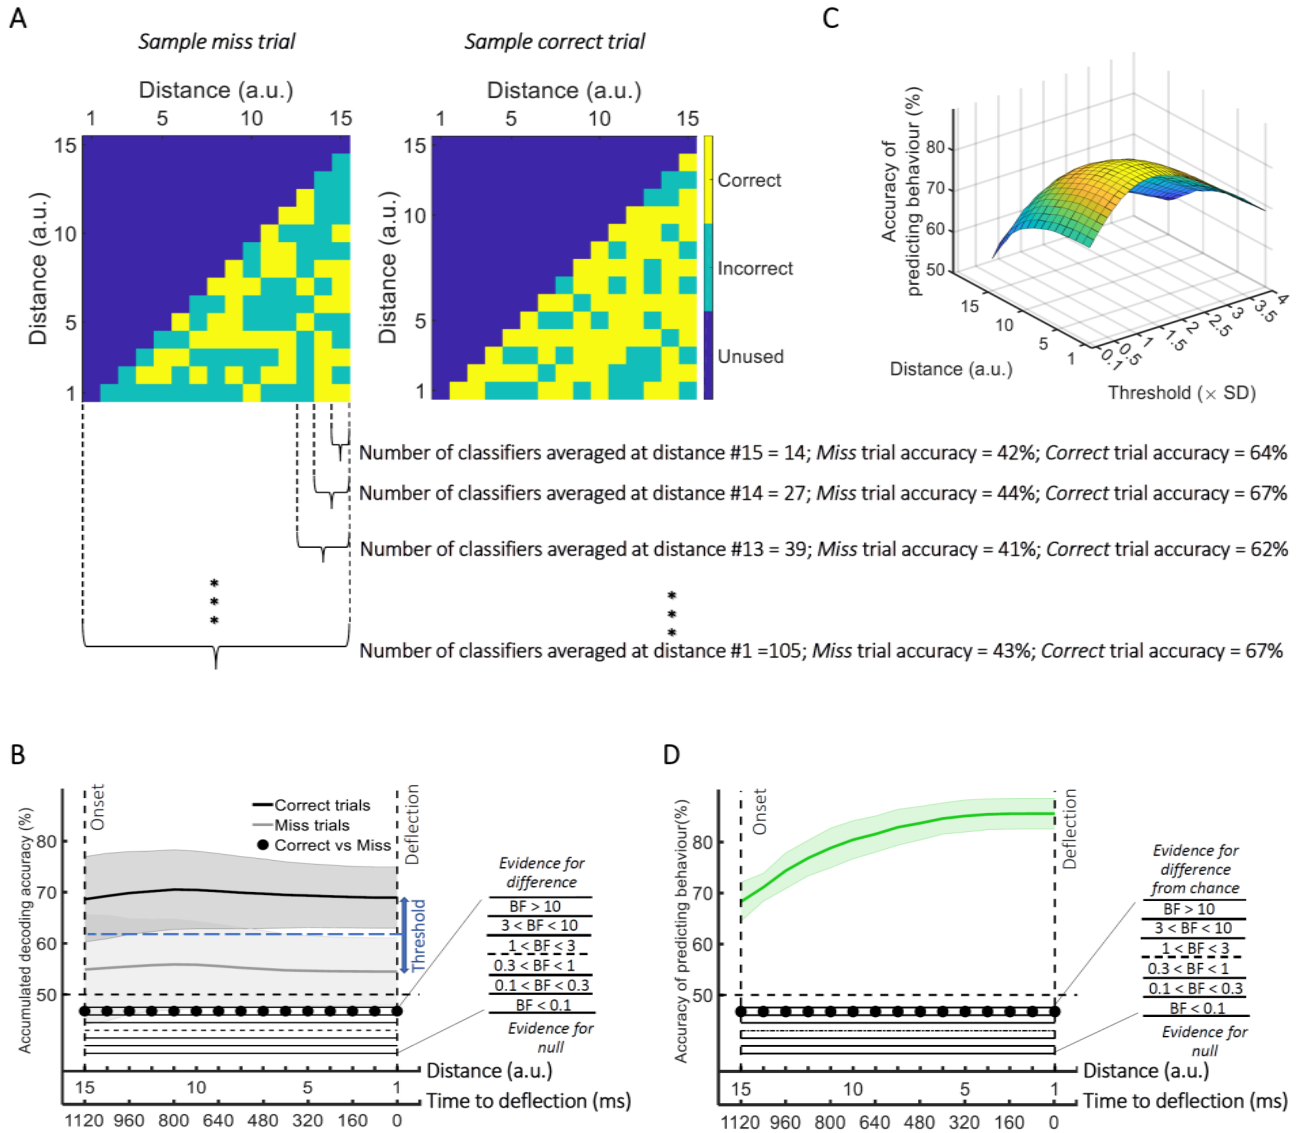

Figure 6. Prediction of behavioural outcome (*correct vs. miss*) trial-by-trial using decoding of *distance to object* information. (A) Sample classifiers' accuracies (correct or incorrect classification of current distance as indicated by colors) for a *miss* (left panel; average accuracy  $\sim$  43% when the dot reached the deflection point) and a *correct* trial (right panel; average accuracy  $\sim$  67% at the deflection point). The classifiers were trained on the data from *correct* trials and tested on the data from *correct* and *miss* trials. For the *miss* trials, around half the classifiers classified the dot's distance incorrectly by the time it reached the deflection point. (B) Accumulation of classifiers' accuracies over decreasing dot distances/time to deflection. This shows stronger information coding of the crucial *distance to object* information on the *correct* trials over *miss* trials. A variable threshold used in (C) is shown as a blue dashed line. (C) Prediction of behavioural outcome as a function of threshold and distance using a second-level behavioural outcome classification. Results show highest prediction accuracies on the participant set at around the threshold of 1.5 (see *Methods*), increasing at closer distances. (D) Accuracy of predicting behavioural outcome for the left-out participant using the threshold obtained from all the other participants as function of distance/time from the deflection point. Results showed successful ( $\sim$ 70%) prediction of behavioural outcome of the trial as early as 80 ms after stimulus appearance. Thick lines and shading refer to average and one standard deviation around the mean across participants, respectively. Bayes Factors are shown in the bottom section of each graph: Filled circles show moderate/strong evidence for either hypothesis and empty circles indicate insufficient evidence (black dots under B and D).

598 Please note that the results presented so far were from *correct* and *miss* trials and we excluded  
599 early, late and wrong-colour *false alarms* to be more specific about the error type. However, the  
600 false alarm results (collapsed across all three types of false alarms) were very similar (Supplementary  
601 Figure 2) to those of the missed trials (Figure 5): noisy information about the *direction of approach*  
602 and at-chance information about the *distance to object*. This may suggest that both miss and false  
603 alarm trials are caused by a similar impaired processing of information, or at least captured similarly  
604 by our decoding methods. The average number of miss trials was 58.17 ( $\pm 21.63$  SD) and false alarm  
605 trials was 65.94 ( $\pm 21.13$  SD; out of 1920 trials).

606

### 607 [Can we decode direction and distance information from eye-tracking data?](#)

608 To see whether we could decode information about the dot motion using only the eye-tracking data,  
609 we repeated the same error data analysis as above, but this time using the 2-dimensional signals  
610 (i.e., corresponding to the x-y coordinates of the gaze location) provided by the eye-tracker (Görger  
611 et al., 2018). The decoding of *direction of approach* from *correct* trials showed above-chance  
612 information (Supplementary Figure 3A) starting from 455 and 460 ms post-stimulus onset for the  
613 Active and Monitoring conditions ( $BF > 10$ ), respectively. The information on *miss* trials was noisier  
614 but showed a similar pattern. The correct and miss trials only showed moderate evidence ( $3 < BF <$   
615  $10$ ) for difference in the span from 310 ms to 490 ms. This suggests that participants moved their  
616 eyes differently for the dots approaching from opposite directions, which is not unexpected (and  
617 observed in the eye-tracking fixation points data). Although the dynamics of this decoding over time  
618 is different to the neural decoding, in line with visually evoked information decoding studies  
619 (VanRullen, 2007; Karimi-Rouzbahani et al., 2017), the eye-movement data do hold enough  
620 information to decode the *direction of approach*.

621

622 In contrast, for the crucial *distance to object* measure, although the eye-tracking data showed  
623 above-chance values at a few distances ( $BF > 10$ ; Supplementary Figure 3B), most were very close to  
624 chance and much lower than those obtained from the neural data (cf. Figure 5B;  $BF > 10$  for the  
625 difference between decoding of neural vs eyetracking data for correct trials; indicated by black dots  
626 in Supplementary Figure 3A). Only for the decoding for *miss vs. correct* trials was there any evidence  
627 (moderate) for similarity between neural and eyetracking data ( $0.1 < BF < 0.3$ ; black dots;  
628 Supplementary Figure 3B). Note that *distance to object* data collapses across identical distances from  
629 the left and right sides of the screen, which avoids the potential confound of eye-movements data  
630 driving the classifier for this crucial distance measure.

631

## 632 Discussion

633 This study developed new methods to gain insights into how attention, the frequency of target  
634 events, and the time doing a task affect the representation of task information in the brain. Our new  
635 multiple object monitoring (MOM) task evoked reliable vigilance decrements in both accuracy and  
636 reaction time in a situation that more closely resembles real-life modern tasks than classic vigilance  
637 tasks. By using the sensitive analysis method of MVPA, we were able to test information coding  
638 across task conditions to evaluate the neural correlates of vigilance decrements. We also developed  
639 a novel informational brain connectivity method, which allowed evaluation of the correlation  
640 between information coding across peri-occipital and peri-frontal areas in different task conditions,  
641 to investigate the brain connectivity under different levels of attention, target frequency and the  
642 time on the task. Finally, we utilised our recent error data analysis to predict forthcoming  
643 behavioural misses with high accuracy. In the following sections, we explain each of the four  
644 contributions in detail and compare them with relevant literature.

645



646 First, the MOM task includes key features of real-world monitoring situations that are not usually  
647 part of other vigilance tasks (e.g., Mackworth, 1948; Temple, 2000; Rosvold et al., 1956; Rosenberg  
648 et al., 2013), and the results show clear evidence of vigilance decrements. Behavioural performance,  
649 measure with both reaction time and accuracy, deteriorated over time in monitoring (infrequent  
650 target) relative to active (frequent target) conditions. These vigilance decrements demonstrate that  
651 the MOM task can be used to explore vigilance in situations more closely resembling modern  
652 environments, namely involving moving stimuli and selection of relevant from irrelevant  
653 information, giving a useful tool for future research.

654

655 Second, the high sensitivity of MVPA to extract information from neural signals allowed us to  
656 investigate the temporal variations in processing as the experiment progressed. The manipulation of  
657 attention showed a strong overall effect with enhanced representation of both the less important  
658 *direction of approach* and the most task-relevant *distance to object* information for cued dots,  
659 regardless of how frequent the targets were (Figure 3). The improved representation of information  
660 under attention extends previous findings from us and others (Woolgar et al., 2015b; Goddard et al.,  
661 2019; Nastase et al., 2017) to moving displays, in which the participants monitor multiple objects  
662 simultaneously.

663

664 The manipulation of target frequency showed that when participants only had to respond  
665 infrequently, modelling real-life monitoring situations, the neural coding of crucial information about  
666 the task dropped, correlating with the decrease in behavioural performance (i.e., vigilance effects in  
667 both accuracy and RT; Figure 2). This suggests that when people monitor for rare targets, they  
668 process or encode the relevant information less effectively as the time passes relative to conditions  
669 in which they are actively engaged in completing the task. Several previous studies have examined  
670 the neural correlates of vigilance decrements using univariate analyses (for a review see Langner et



671 al. (2013)). However, univariate analyses fail to capture widespread but subtle differences of  
672 patterns between conditions across distant brain networks. One recent study utilized the sensitivity  
673 of MVPA to extract task-relevant and task-irrelevant information under sustained attention (Megan  
674 et al., 2015). In this case, however, the aspects of information were similar in identity (i.e. high-level  
675 visual categories of face and scenes) and switched their attentional role (i.e. attended vs.  
676 unattended) across the experiment, which makes it difficult to see whether (if at all) vigilance  
677 decrements would differentially affect encoding of different aspects of information depending on  
678 their relevance to the task. To address this issue, here we not only switched the task-relevance of  
679 information across the experiment to replicate the attentional effect of that study (i.e. cued/un-cued  
680 dots), but we also studied two aspects of the dot motion information that varied in importance for  
681 carrying out the task (i.e., *direction of approach* and *distance to object*) with unchanging roles across  
682 the experiment. While switching between dot colours showed the effect of attention, with greater  
683 representation of the cued dots over uncued dots, the relevance of the *direction of approach* and  
684 the *distance to object* did not vary. The less relevant direction information was unaffected by target  
685 frequency, whereas the coding of the critical task-relevant distance information correlated with the  
686 decrease in behavioural performance over time. This is relevant to theories of vigilance, by  
687 demonstrating that the task-relevance of information might be a major factor in whether vigilance  
688 decrements occur.

689  
690 It is important to note that previous studies have tried other physiological/behavioural measures to  
691 determine participants' vigilance or alertness, such as pupil size (Yoss et al., 1970), response time  
692 variability (Rosenberg et al., 2013), blood pressure and thermal energy (Lohani et al., 2019) or even  
693 body temperature (Molina et al., 2019). We used highly-sensitive analysis of neuroimaging data so  
694 that we could address two questions that could not be answered using these more general vigilance  
695 measures. Our approach allowed us to test for changes in the way information is processed in the

696 brain, particularly testing for differences in the impact of monitoring on the relevance of the  
697 information, rather than whether the participants were vigilant and alert in general. Moreover, we  
698 could also investigate how relevant and less relevant information was affected by the target  
699 frequency and time on the task, which could explain the behavioural vigilance decrement observed  
700 in many previous studies (e.g., Dehais et al., 2019; Wolfe et al., 2005; Wolfe et al., 2007; Kamzanova  
701 et al., 2014; Ishibashi et al., 2012). We tested our methods also on the eye-tracking data and found  
702 that the critical task-relevant information change under monitoring conditions could not be  
703 replicated based on eye-movements, demonstrating the benefit of the neural approach.

704

705 Third, our information-based brain connectivity method showed weaker connectivity between the  
706 peri-frontal attentional network and the peri-occipital visual areas of the brain in the unattended  
707 and monitoring conditions (Figure 4), where participants encountered fewer targets relative to the  
708 other conditions. We also observed less connectivity between the same areas on *miss vs. correct*  
709 trials, which might explain the behavioural outcome of the trials. Most previous neuroimaging  
710 studies have used univariate brain connectivity analyses, which are prone to missing existing  
711 functional connectivity across areas when encountering low-amplitude activity on individual sensors  
712 (Anzellotti & Coutanche, 2018; Basti et al., 2020). The method we used here evaluated the  
713 correlation between representational dissimilarity matrices, which has provided high-dimensional  
714 information about *distance to object*, obtained from multiple sensors across the brain areas. This  
715 makes the analysis more sensitive to capturing subtle connectivity and also aligns with a major  
716 recent shift in literature from univariate to multivariate informational connectivity analyses  
717 (Goddard et al., 2016; Goddard et al., 2019; Karimi-Rouzbahani et al., 2019; Karimi-Rouzbahani,  
718 2017; Anzellotti & Coutanche, 2018; Basti et al., 2020).

719

720 Fourth, building upon our recently-developed method of error analysis (Woolgar et al., 2019), we  
721 were able to predict forthcoming behavioural misses before the response was given. This method  
722 only used *correct* trials for training, which makes its implementation plausible for real-world  
723 situations since we usually have plenty of correct trials and only few miss trials (i.e., cases when the  
724 railway controller diverts the trains correctly vs. misses and a collision happens). In our study, the  
725 method showed a large decline in the crucial task-relevant (i.e., *distance to object*) information  
726 decoding on *miss* vs. *correct* trials but less decline in the less task-relevant information (i.e., *direction*  
727 *of approach*). A complementary analysis allowed the prediction of behaviourally missed trials as  
728 soon as the stimulus appeared on the screen (after ~80 ms), which was ~1200 ms before the time of  
729 response. This method was generalisable across participants, with the decision threshold for trial  
730 classification other participants' data successful in predicting errors for a left-out participant. A  
731 number of previous studies have shown that behavioural performance could be correlated with  
732 aspects of brain activity even before the stimulus onset (Eichele et al., 2008; Weissman et al., 2006;  
733 Sadaghiani et al., 2015). This can be crucial for many high-risk environments, including semi-  
734 autonomous car driving and railway control. Those studies have explained the behavioural errors by  
735 implicit measures such as less deactivation of the default-mode network, reduced stimulus-evoked  
736 sensory activity (Weissman et al., 2006; Eichele et al., 2008) and even the connectivity between  
737 sensory and vigilance-related/default-mode brain areas (Sadaghiani et al., 2015). It would be  
738 informative, however, if they could show how (if at all) the processing of task-relevant information is  
739 disrupted in the brain and how this might lead to behavioural errors. To serve an applied purpose, it  
740 would be ideal if there was a procedure to use those neural signatures to predict behavioural  
741 outcomes. Only two previous studies have approached this goal. Sadaghiani et al. (2015) and Dehais  
742 et al. (2019) reported maximum prediction accuracies of 63% and 72% (with adjusted chance levels  
743 of 55% and 59%, respectively), far lower than what we have obtained here (up to 85% with a chance  
744 level of 50%), suggesting our method accesses more relevant neural signatures of vigilance  
745 decrements, or is more sensitive in discriminating these. The successful prediction of an error from

746 neural data more than a second in advance of the impending response provides a promising avenue  
747 for detecting lapses of attention before any consequences occur.

748

749 Current explanations for vigilance effects generally fall into two categories: mind-wandering and  
750 cognitive overload. In the first, the low cognitive demands of monitoring tasks result in mind-  
751 wandering and then, when a response is required, there are insufficient resources dedicated to the  
752 task (e.g., malleable attention theory (Manly et al., 1999; Smallwood et al., 2006; Young et al.,  
753 2002)). In the second, the demands of sustaining attention depletes cognitive resources over time  
754 leading to insufficient resources and increased errors in later stages of the task (e.g., Helton et al.,  
755 2008; Helton et al., 2011; Warm et al., 2008). There are several previous observations of decreased  
756 functional connectivity during mind wandering (Chou et al., 2017; Kucyi et al., 2018; van Son et al.,  
757 2019), which our informational connectivity results broadly replicate. For example, Chou et al.  
758 (2017) reported a decrease in functional connectivity between visual and sensorimotor and in turn  
759 to frontal brain areas in later stages of a resting-state mind-wandering fMRI study in which  
760 participants were instructed to draw their mind to specific but broad sets of thoughts. In another  
761 study, using EEG-fMRI, von Son et al. (2019) found reduced functional connectivity between the  
762 dorsolateral PFC, dorsal anterior cingulate cortex (ACC), and posterior parietal regions, namely the  
763 “executive control network”, when participants counted and reported their number of inhaled and  
764 episodes of mind wandering. Our finding of a decrease in higher order cognitive (peri-frontal) and  
765 sensory (peri-occipital) areas in later (compared with early) stages of the experiment is broadly  
766 consistent with these findings, but we are unable to distinguish whether this is due to mind  
767 wandering or the depletion of cognitive resources, as in our task either is a plausible explanation for  
768 the effect.

769

770 The overall goal of this study was to understand how neural information processing of dynamic  
771 displays were affected by attention and target frequency, and whether reliable changes in behaviour  
772 over time could be predicted on the basis of neural patterns. We observed that the neural  
773 representation of critically relevant information in the brain decreases over time, especially when  
774 targets are infrequent. This neural representation was particularly poor on trials where participants  
775 missed the target. We used this observation to predict behavioural outcome of individual trials, and  
776 showed that we could accurately predict behavioural outcome more than a second before action  
777 was needed. These results provide new insights about how vigilance decrements impact information  
778 coding in the brain and propose an avenue for predicting behavioural errors using novel  
779 neuroimaging analysis techniques.

780

## 781 Acknowledgments

782 This work was funded by an Australian Research Council (ARC) Discovery Project grant to A.N.R and  
783 A.W. (DP170101780). A.W. was supported by an ARC Future Fellowship (FT170100105) and MRC  
784 intramural funding SUAG/052/G101400. We thank Denise Moerel, Mark Wiggins, Jeremy Wolfe and  
785 William Helton for contributions to an earlier design of the MOM task.

786

## 787 References

- 788 Adler, C. M., Sax, K. W., Holland, S. K., Schmithorst, V., Rosenberg, L., & Strakowski, S. M. (2001). Changes  
789 in neuronal activation with increasing attention demand in healthy volunteers: an fMRI study. *Synapse*, 42(4),  
790 266-272.
- 791 Alnaes, D., Kaufmann, T., Richard, G., Duff, E. P., Sneve, M. H., Endestad, T., ... & Westlye, L. T. (2015).  
792 Attentional load modulates large-scale functional brain connectivity beyond the core attention networks.  
793 *Neuroimage*, 109, 260-272.
- 794 Anzellotti, S., & Coutanche, M. N. (2018). Beyond functional connectivity: investigating networks of  
795 multivariate representations. *Trends in cognitive sciences*, 22(3), 258-269.
- 796 Basti, A., Nili, H., Hauk, O., Marzetti, L., & Henson, R. (2020, February 11). Multivariate connectivity: a  
797 conceptual and mathematical review. <https://doi.org/10.31219/osf.io/2q9v4>

- 798 Baillet, S. (2017). Magnetoencephalography for brain electrophysiology and imaging. *Nature neuroscience*,  
799 20(3), 327-339.
- 800 Benedict, R. H., Shucard, D. W., Maria, M. P. S., Shucard, J. L., Abara, J. P., Coad, M. L., ... & Lockwood, A.  
801 (2002). Covert auditory attention generates activation in the rostral/dorsal anterior cingulate cortex. *Journal of*  
802 *Cognitive Neuroscience*, 14(4), 637-645.
- 803 Brainard, D. H. (1997). The psychophysics toolbox. *Spatial vision*, 10(4), 433-436.
- 804 Chou, Y. H., Sundman, M., Whitson, H. E., Gaur, P., Chu, M. L., Weingarten, C. P., ... & Diaz, M. T. (2017).  
805 Maintenance and representation of mind wandering during Resting-State fMRI. *Scientific reports*, 7, 40722.
- 806 Coull, J. T., Frith, C. D., Frackowiak, R. S. J., & Grasby, P. M. (1996). A fronto-parietal network for rapid  
807 visual information processing: a PET study of sustained attention and working memory. *Neuropsychologia*,  
808 34(11), 1085-1095.
- 809 Dehais, F., Roy, R. N., & Scannella, S. (2019). Inattentive deafness to auditory alarms: Inter-individual  
810 differences, electrophysiological signature and single trial classification. *Behavioural brain research*, 360, 51-59.
- 811 Dienes, Z. (2014). Using Bayes to get the most out of non-significant results. *Frontiers in psychology*, 5, 781.
- 812 Duncan, J. (2010). The multiple-demand (MD) system of the primate brain: mental programs for intelligent  
813 behaviour. *Trends in cognitive sciences*, 14(4), 172-179.
- 814 Duncan, J., & Owen, A. M. (2000). Common regions of the human frontal lobe recruited by diverse cognitive  
815 demands. *Trends in neurosciences*, 23(10), 475-483.
- 816 Eichele, H., Juvodden, H., Ullsperger, M., & Eichele, T. (2010). Mal-adaptation of event-related EEG responses  
817 preceding performance errors. *Frontiers in human neuroscience*, 4, 65.
- 818 Eichele, T., Debener, S., Calhoun, V. D., Specht, K., Engel, A. K., Hugdahl, K., ... & Ullsperger, M. (2008).  
819 Prediction of human errors by maladaptive changes in event-related brain networks. *Proceedings of the National*  
820 *Academy of Sciences*, 105(16), 6173-6178.
- 821 Fedorenko, E., Duncan, J., & Kanwisher, N. (2013). Broad domain generality in focal regions of frontal and  
822 parietal cortex. *Proceedings of the National Academy of Sciences*, 110(41), 16616-16621.
- 823 Gilbert, S. J., Simons, J. S., Frith, C. D., & Burgess, P. W. (2006). Performance-related activity in medial rostral  
824 prefrontal cortex (area 10) during low-demand tasks. *Journal of Experimental Psychology: Human Perception*  
825 *and Performance*, 32(1), 45.
- 826 Goddard, E., Carlson, T. A., & Woolgar, A. (2019). Spatial and feature-selective attention have distinct effects  
827 on population-level tuning. *bioRxiv*, 530352.
- 828 Goddard, E., Carlson, T. A., Dermody, N., & Woolgar, A. (2016). Representational dynamics of object  
829 recognition: Feedforward and feedback information flows. *Neuroimage*, 128, 385-397.
- 830 Görgen, K., Hebart, M. N., Allefeld, C., & Haynes, J. D. (2018). The same analysis approach: Practical  
831 protection against the pitfalls of novel neuroimaging analysis methods. *Neuroimage*, 180, 19-30.
- 832 Greicius, M. D., Krasnow, B., Reiss, A. L., & Menon, V. (2003). Functional connectivity in the resting brain: a  
833 network analysis of the default mode hypothesis. *Proceedings of the National Academy of Sciences*, 100(1),  
834 253-258.
- 835 Greicius, M. D., Supekar, K., Menon, V., & Dougherty, R. F. (2009). Resting-state functional connectivity  
836 reflects structural connectivity in the default mode network. *Cerebral cortex*, 19(1), 72-78.
- 837 Grootswagers, T., Wardle, S. G., & Carlson, T. A. (2017). Decoding dynamic brain patterns from evoked  
838 responses: A tutorial on multivariate pattern analysis applied to time series neuroimaging data. *Journal of*  
839 *cognitive neuroscience*, 29(4), 677-697
- 840 Helton, W. S., & Russell, P. N. (2011). Feature absence–presence and two theories of lapses of sustained  
841 attention. *Psychological research*, 75(5), 384-392.
- 842 Helton, W. S., & Warm, J. S. (2008). Signal salience and the mindlessness theory of vigilance. *Acta*  
843 *psychologica*, 129(1), 18-25.

- 844 Indovina, I., & Macaluso, E. (2004). Occipital–parietal interactions during shifts of exogenous visuospatial  
845 attention: trial-dependent changes of effective connectivity. *Magnetic resonance imaging*, 22(10), 1477-1486.
- 846 Ishibashi, K., Kita, S., & Wolfe, J. M. (2012). The effects of local prevalence and explicit expectations on  
847 search termination times. *Attention, Perception, & Psychophysics*, 74(1), 115-123.
- 848 Jeffreys, H. (1961). *Theory of probability* (3rd ed.). New York: Oxford University Press.
- 849 Johannsen, P., Jakobsen, J., Bruhn, P., Hansen, S. B., Gee, A., Stødkilde-Jørgensen, H., & Gjedde, A. (1997).  
850 Cortical sites of sustained and divided attention in normal elderly humans. *Neuroimage*, 6(3), 145-155.
- 851 Kamzanova, A. T., Kustubayeva, A. M., & Matthews, G. (2014). Use of EEG workload indices for diagnostic  
852 monitoring of vigilance decrement. *Human factors*, 56(6), 1136-1149.
- 853 Karimi-Rouzbahani, H. (2018). Three-stage processing of category and variation information by entangled  
854 interactive mechanisms of peri-occipital and peri-frontal cortices. *Scientific reports*, 8(1), 1-22.
- 855 Karimi-Rouzbahani, H., Bagheri, N., & Ebrahimpour, R. (2017). Hard-wired feed-forward visual mechanisms  
856 of the brain compensate for affine variations in object recognition. *Neuroscience*, 349, 48-63.
- 857 Karimi-Rouzbahani, H., Vahab, E., Ebrahimpour, R., & Menhaj, M. B. (2019). Spatiotemporal analysis of  
858 category and target-related information processing in the brain during object detection. *Behavioural brain  
859 research*, 362, 224-239.
- 860 Kleiner, M., Brainard, D., & Pelli, D. (2007). What's new in Psychtoolbox-3?
- 861 Kriegeskorte, N., Mur, M., & Bandettini, P. A. (2008). Representational similarity analysis-connecting the  
862 branches of systems neuroscience. *Frontiers in systems neuroscience*, 2, 4.
- 863 Kucyi, A. (2018). Just a thought: How mind-wandering is represented in dynamic brain connectivity.  
864 *Neuroimage*, 180, 505-514.
- 865 Langner, R., & Eickhoff, S. B. (2013). Sustaining attention to simple tasks: a meta-analytic review of the neural  
866 mechanisms of vigilant attention. *Psychological bulletin*, 139(4), 870.
- 867 Lee, M., & Wagenmakers, E. J. (2005). Bayesian statistical inference in psychology: comment on Trafimow  
868 (2003). *Psychological Review*, 112, 662–668.
- 869 Lohani, M., Payne, B. R., & Strayer, D. L. (2019). A review of psychophysiological measures to assess  
870 cognitive states in real-world driving. *Frontiers in human neuroscience*, 13.
- 871 Mackworth, N. H. (1948). The breakdown of vigilance during prolonged visual search. *Quarterly Journal of  
872 Experimental Psychology*, 1(1), 6-21.
- 873 Manly, T., Robertson, I. H., Galloway, M., & Hawkins, K. (1999). The absent mind: further investigations of  
874 sustained attention to response. *Neuropsychologia*, 37(6), 661-670.
- 875 Mazaheri, A., Nieuwenhuis, I. L., Van Dijk, H., & Jensen, O. (2009). Prestimulus alpha and mu activity predicts  
876 failure to inhibit motor responses. *Human brain mapping*, 30(6), 1791-1800.
- 877 Megan, T. D., Cohen, J. D., Lee, R. F., Norman, K. A., & Turk-Browne, N. B. (2015). Closed-loop training of  
878 attention with real-time brain imaging. *Nature neuroscience*, 18(3), 470.
- 879 Molina, E., Sanabria, D., Jung, T. P., & Correa, A. (2019). Electroencephalographic and peripheral temperature  
880 dynamics during a prolonged psychomotor vigilance task. *Accident Analysis & Prevention*, 126, 198-208.
- 881 Nastase, S. A., Connolly, A. C., Oosterhof, N. N., Halchenko, Y. O., Guntupalli, J. S., Visconti di Oleggio  
882 Castello, M., ... & Haxby, J. V. (2017). Attention selectively reshapes the geometry of distributed semantic  
883 representation. *Cerebral Cortex*, 27(8), 4277-4291.
- 884 O'Connell, R. G., Dockree, P. M., Robertson, I. H., Bellgrove, M. A., Foxe, J. J., & Kelly, S. P. (2009).  
885 Uncovering the neural signature of lapsing attention: electrophysiological signals predict errors up to 20 s before  
886 they occur. *Journal of Neuroscience*, 29(26), 8604-8611.
- 887 Ortuno, F., Ojeda, N., Arbizu, J., Lopez, P., Martu-Climent, J. M., Penuelas, I., & Cervera, S. (2002). Sustained  
888 attention in a counting task: normal performance and functional neuroanatomy. *Neuroimage*, 17(1), 411-420.



- 889 Périn, B., Godefroy, O., Fall, S., & De Marco, G. (2010). Alertness in young healthy subjects: an fMRI study of  
890 brain region interactivity enhanced by a warning signal. *Brain and cognition*, 72(2), 271-281.
- 891 Raichle, M. E. (2015). The brain's default mode network. *Annual review of neuroscience*, 38, 433-447.
- 892 Rich, A. N., Kunar, M. A., Van Wert, M. J., Hidalgo-Sotelo, B., Horowitz, T. S., & Wolfe, J. M. (2008). Why  
893 do we miss rare targets? Exploring the boundaries of the low prevalence effect. *Journal of Vision*, 8(15), 15-15.
- 894 Rosenberg, M., Noonan, S., DeGutis, J., & Esterman, M. (2013). Sustaining visual attention in the face of  
895 distraction: a novel gradual-onset continuous performance task. *Attention, Perception, & Psychophysics*, 75(3),  
896 426-439.
- 897 Rosvold, H. E., Mirsky, A. F., Sarason, I., Bransome Jr, E. D., & Beck, L. H. (1956). A continuous performance  
898 test of brain damage. *Journal of consulting psychology*, 20(5), 343.
- 899 Rouder, J. N., Morey, R. D., Speckman, P. L., & Province, J. M. (2012). Default Bayes factors for ANOVA  
900 designs. *Journal of Mathematical Psychology*, 56(5), 356-374.
- 901 Sadaghiani, S., Poline, J. B., Kleinschmidt, A., & D'Esposito, M. (2015). Ongoing dynamics in large-scale  
902 functional connectivity predict perception. *Proceedings of the National Academy of Sciences*, 112(27), 8463-  
903 8468.
- 904 Schnell, K., Heekeren, K., Schnitker, R., Daumann, J., Weber, J., Heßelmann, V., ... & Gouzoulis-Mayfrank, E.  
905 (2007). An fMRI approach to particularize the frontoparietal network for visuomotor action monitoring:  
906 detection of incongruence between test subjects' actions and resulting perceptions. *Neuroimage*, 34(1), 332-341.
- 907 Smallwood, J., & Schooler, J. W. (2006). The restless mind. *Psychological bulletin*, 132(6), 946.
- 908 Sturm, W., De Simone, A., Krause, B. J., Specht, K., Hesselmann, V., Radermacher, I., ... & Willmes, K.  
909 (1999). Functional anatomy of intrinsic alertness: evidence for a fronto-parietal-thalamic-brainstem network in  
910 the right hemisphere. *Neuropsychologia*, 37(7), 797-805.
- 911 Tana, M. G., Montin, E., Cerutti, S., & Bianchi, A. M. (2010). Exploring cortical attentional system by using  
912 fMRI during a Continuous Performance Test. *Computational intelligence and neuroscience*, 2010.
- 913 Temple, J. G., Warm, J. S., Dember, W. N., Jones, K. S., LaGrange, C. M., & Matthews, G. (2000). The effects  
914 of signal salience and caffeine on performance, workload, and stress in an abbreviated vigilance task. *Human*  
915 *factors*, 42(2), 183-194.
- 916 Thakral, P. P., & Slotnick, S. D. (2009). The role of parietal cortex during sustained visual spatial attention.  
917 *Brain Research*, 1302, 157-166.
- 918 van Son, D., de Rover, M., De Blasio, F. M., van der Does, W., Barry, R. J., & Putman, P. (2019).  
919 Electroencephalography theta/beta ratio covaries with mind wandering and functional connectivity in the  
920 executive control network. *Annals of the New York Academy of Sciences*, 1452(1), 52.
- 921 VanRullen, R. (2007). The power of the feed-forward sweep. *Advances in Cognitive Psychology*, 3(1-2), 167.
- 922 Warm, J. S., Parasuraman, R., & Matthews, G. (2008). Vigilance requires hard mental work and is stressful.  
923 *Human factors*, 50(3), 433-441.
- 924 Weissman, D. H., Roberts, K. C., Visscher, K. M., & Woldorff, M. G. (2006). The neural bases of momentary  
925 lapses in attention. *Nature neuroscience*, 9(7), 971-978.
- 926 Wingen, M., Kuypers, K. P., van de Ven, V., Formisano, E., & Ramaekers, J. G. (2008). Sustained attention and  
927 serotonin: a pharmacofMRI study. *Human Psychopharmacology: Clinical and Experimental*, 23(3), 221-230.
- 928 Wolfe, J. M., Horowitz, T. S., & Kenner, N. M. (2005). Rare items often missed in visual searches. *Nature*,  
929 435(7041), 439-440.
- 930 Wolfe, J. M., Horowitz, T. S., Van Wert, M. J., Kenner, N. M., Place, S. S., & Kibbi, N. (2007). Low target  
931 prevalence is a stubborn source of errors in visual search tasks. *Journal of experimental psychology: General*,  
932 136(4), 623.
- 933 Woolgar, A., Afshar, S., Williams, M. A., & Rich, A. N. (2015a). Flexible coding of task rules in frontoparietal  
934 cortex: an adaptive system for flexible cognitive control. *Journal of cognitive neuroscience*, 27(10), 1895-1911.



- 935 Woolgar, A., Dermody, N., Afshar, S., Williams, M. A., & Rich, A. N. (2019). Meaningful patterns of  
936 information in the brain revealed through analysis of errors. *bioRxiv*, 673681.
- 937 Woolgar, A., Hampshire, A., Thompson, R., & Duncan, J. (2011). Adaptive coding of task-relevant information  
938 in human frontoparietal cortex. *Journal of Neuroscience*, 31(41), 14592-14599.
- 939 Woolgar, A., Williams, M. A., & Rich, A. N. (2015b). Attention enhances multi-voxel representation of novel  
940 objects in frontal, parietal and visual cortices. *Neuroimage*, 109, 429-437.
- 941 Yoss, R. E., Moyer, N. J., & Hollenhorst, R. W. (1970). Pupil size and spontaneous pupillary waves associated  
942 with alertness, drowsiness, and sleep. *Neurology*, 20(6), 545-545.
- 943 Young, M. S., & Stanton, N. A. (2002). Malleable attentional resources theory: a new explanation for the effects  
944 of mental underload on performance. *Human factors*, 44(3), 365-375.
- 945 Zellner, A., & Siow, A. (1980). Posterior odds ratios for selected regression hypotheses. In J.M. Bernardo, M.H.  
946 DeGroot, D.V. Lindley, A.F.M. Smith (Eds.), *Bayesian Statistics: proceedings of the first international meeting*  
947 *held in Valencia (Spain)* (585–603). University of Valencia.
- 948
- 949
- 950
- 951
- 952
- 953
- 954
- 955
- 956
- 957
- 958
- 959
- 960
- 961
- 962
- 963
- 964
- 965
- 966
- 967
- 968
- 969
- 970
- 971
- 972
- 973

## 974 Supplementary Material

975 Supplementary figure 1 shows the same decoding results as presented in Figure 3 but  
976 evaluated against chance-level decoding (50%).

977 Our first analysis was to verify that our analyses could decode the important aspects of the display,  
978 relative to chance, given the overlapping moving stimuli. Here, we give the detailed results of this  
979 analysis.

980  
981 We started with the information about the *direction of approach* (top left or bottom right of screen)  
982 which is a strong visual signal but not critical to the task decision. From 95 ms post-stimulus onset  
983 onwards, this visual information could be decoded from the MEG signal for all combinations of the  
984 factors: Attended and Unattended dots, both Target Frequency conditions (Active, Monitoring), and  
985 both our Time on Task durations (Early - first 5 blocks; Late - last 5 blocks; all BF > 10, different from  
986 chance).

987  
988 All conditions were decodable above chance until at least 385 ms post-stimulus onset (BF > 3;  
989 Supplementary Figure 1A), which was when the dots came closer to the centre, losing their visual  
990 difference. There was a rapid increase in information about the *direction of approach* between 50  
991 ms to 150 ms post-stimulus onset, consistent with an initial forward sweep of visual information  
992 processing (VanRullen, 2007; Karimi-Rouzbahani et al., 2017; Karimi-Rouzbahani et al., 2019). For  
993 attended dots only (but regardless of the Target Frequency or Time on Task), the information then  
994 increased again before the deflection time, and remained different from chance until 1915 ms post-  
995 stimulus onset, which is just before the dot faded (Supplementary Figure 1A). The second rise of  
996 decoding, which was more pronounced for the attended dots, could reflect the increasing relevance  
997 to the task as the dot approached the crucial deflection point, but it could also be due to higher  
998 visual acuity in foveal compared to peripheral areas of the visual field. The decoding peak observed

999 after the deflection point for the attended dots, was most probably caused by the large visual  
1000 difference between the deflection trajectories for the dots approaching from the left vs. right side of  
1001 the screen (see the deflection trajectories in Figure 1A).

1002  
1003 The most task-relevant feature of the motion is the distance between the moving dot and the  
1004 central object, with the deflection point of the trajectories being the key decision point. We  
1005 therefore tested for decoding of distance information (*distance to object*, see *Methods*). There was a  
1006 brief increase in decoding of *distance to object* for attended dots across the other factors (Target  
1007 Frequency and Time on Task) between the 15<sup>th</sup> and 10<sup>th</sup> distances and for the unattended dots  
1008 across the other factors between 15<sup>th</sup> and the 12<sup>th</sup> distances. This corresponds to the first 400 ms for  
1009 the attended dots and the first 240 ms for the unattended dots after the onset (Supplementary  
1010 Figure 1B). Distance decoding then dropped somewhat before ascending again as the dot  
1011 approached the deflection point. The second rise of decoding, which was more pronounced for the  
1012 attended dots, could reflect the increasing relevance to the task as the dot approached the crucial  
1013 deflection point, but it could also be due to higher visual acuity in foveal compared to peripheral  
1014 areas of the visual field. There was strong evidence that decoding of distance information for all  
1015 conditions was greater than chance (50%, BF > 10) across all 15 distance levels (Supplementary  
1016 Figure 1B).

1017

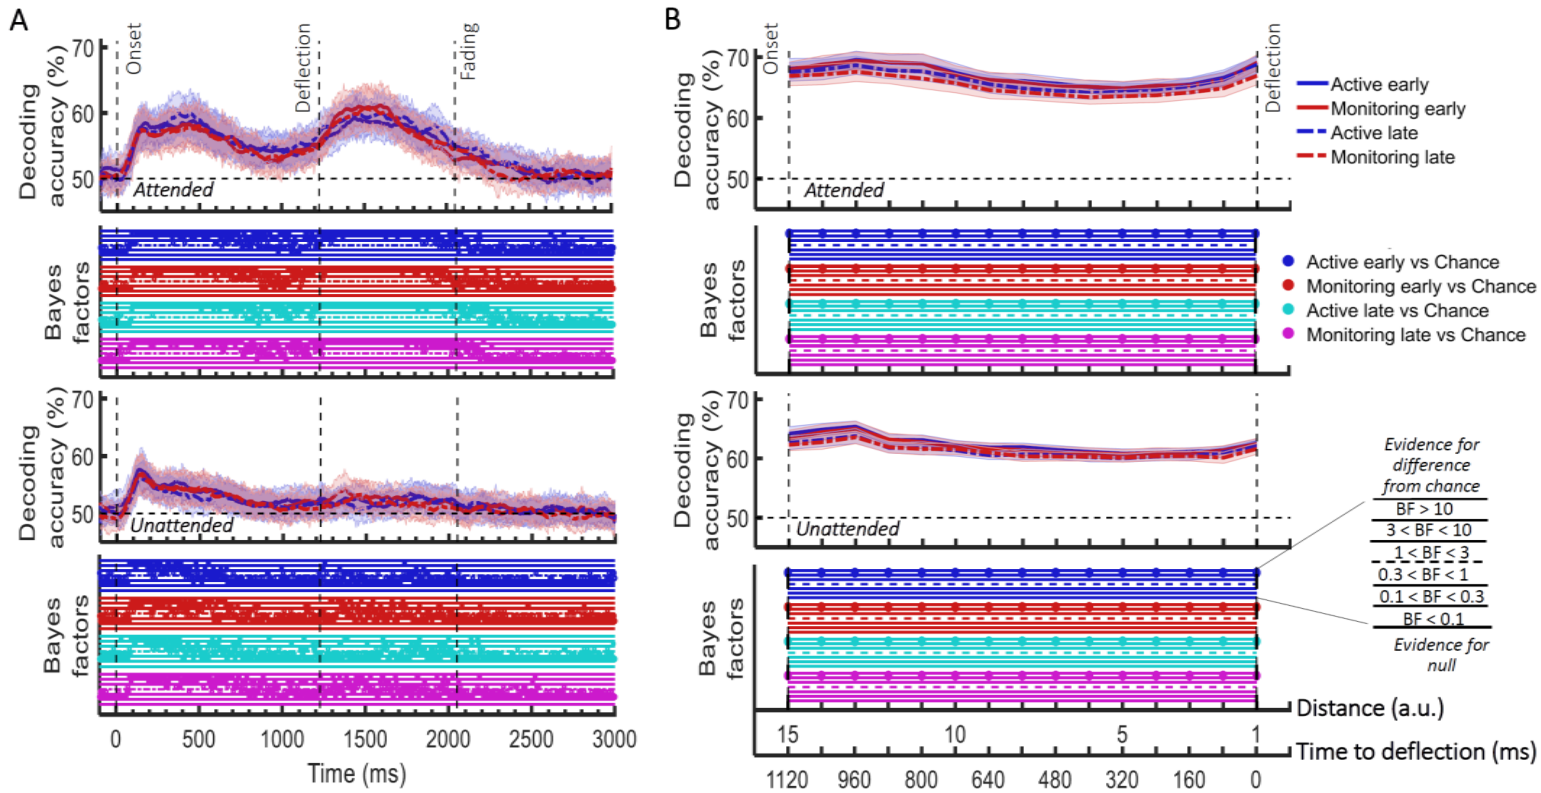

Supplementary Figure 1. Impact of different conditions in the *direction of approach* (A) and *distance to object* (B) information coding and their Bayesian evidence for difference from chance. (A) Decoding of *direction of approach* information (less task-relevant). The horizontal dashed line refers to chance-level decoding. Upper graph: Attended colour dot; Lower graph: Unattended ('distractor') colour dot. (B) Decoding of *distance to object* information (most task-relevant). Thick lines show the average across participants (shading 95% confidence intervals). Vertical dashed lines indicate critical times in the trial. Bayes Factors are shown in the bottom section of each graph: Filled circles show moderate/strong evidence for either hypothesis and empty circles indicate insufficient evidence. They show the results of Bayes factor analysis when evaluating the difference of the decoding values from chance as explained in *Methods*. Early = data from the first 5 blocks (~10 minutes). Late = data from the last 5 blocks (~10 minutes).

1018

1019

1020

1021

1022 Supplementary figure 2 shows the data for false alarm trials.

1023

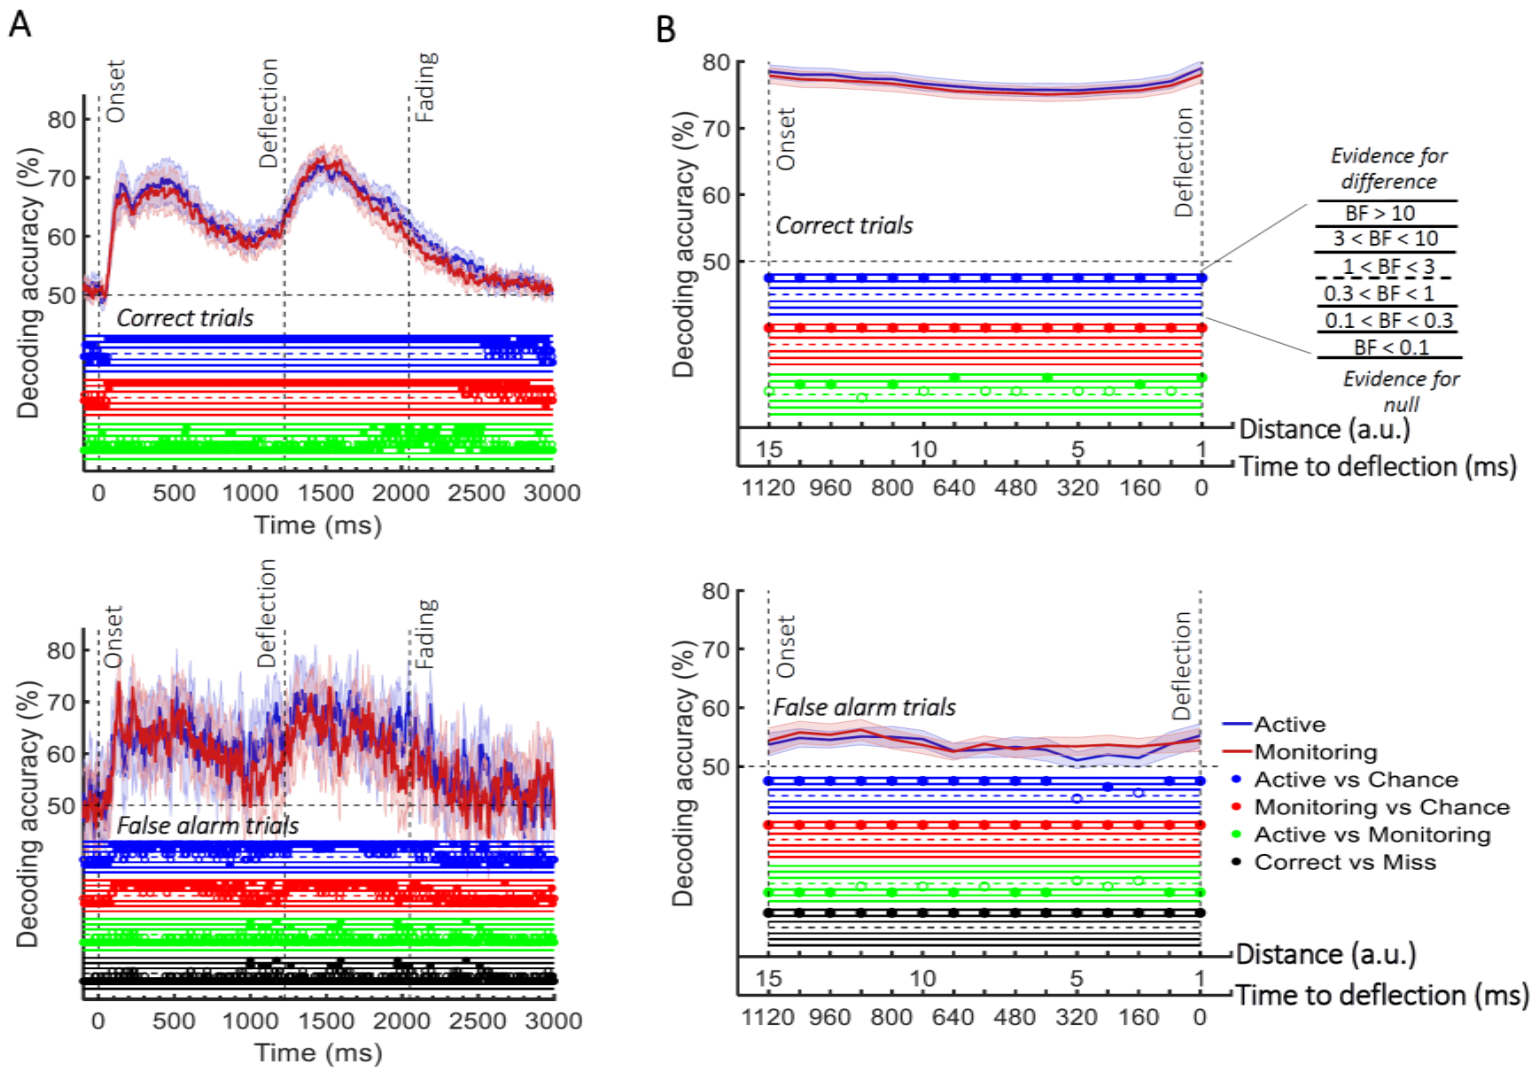

Supplementary Figure 2. Decoding of information on *correct* vs. *false alarm* trials. (A) Decoding of *direction of approach* information (less task-relevant). (B) Decoding of *distance to object* information (most task-relevant). The horizontal dashed lines refer to chance-level decoding. Top row: Decoding using correct trials; Bottom row: Decoding using false alarm trials. In both top and bottom rows, the classifiers were trained on correct trials and tested on *correct* and *false alarm* trials, respectively. Thick lines show the average across participants (shading 95% confidence intervals). Vertical dashed lines indicate critical events in the trial. Bayes Factors are shown in the bottom section of each graph: Filled circles show moderate/strong evidence for either hypothesis and empty circles indicate insufficient evidence. They show the results of Bayes factor analysis when evaluating the difference of the decoding values from chance for Active (blue) and Monitoring (red) conditions separately, the comparison of the two conditions (green) and the comparison of correct and miss trials (black). Note that for the comparison of correct and miss trials, Active and Monitoring conditions were averaged separately.

1024

1025

1026

1027 Supplementary Figure 3 shows the analysis of eyetracking data using the same

1028 decoding methods as for the neural data.

1029

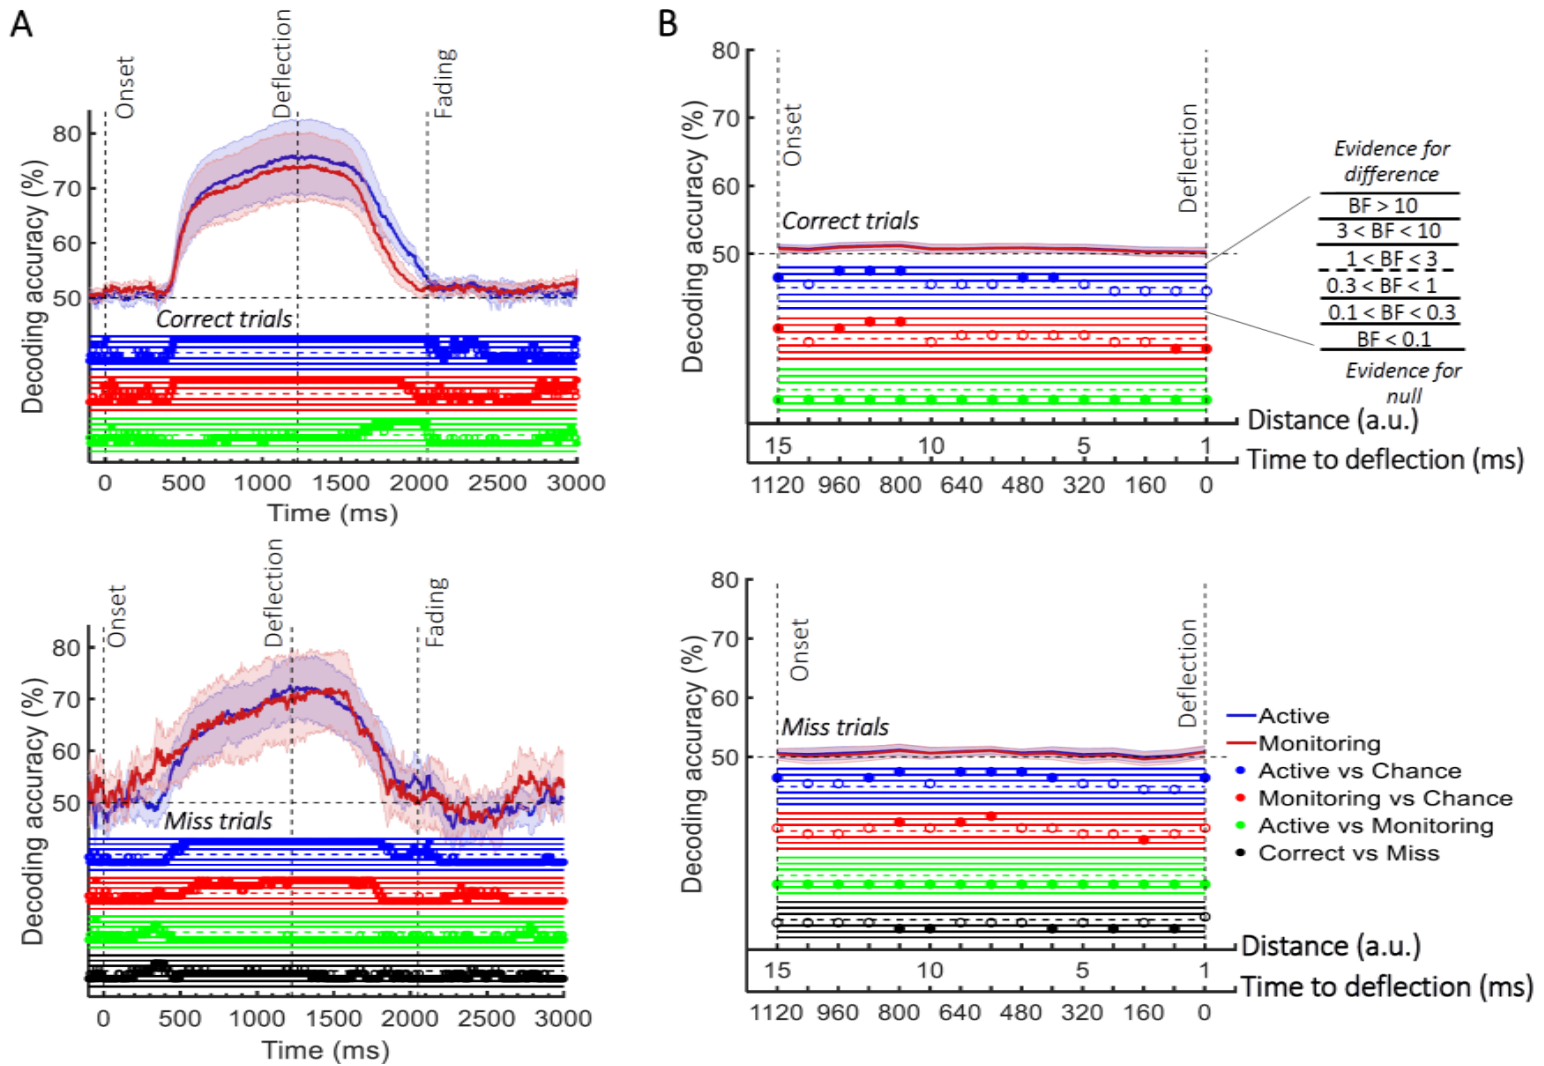

Supplementary Figure 3. Decoding of information about the dot motion using the eye-tracking data. (A) Decoding of *direction of approach* information (less task-relevant). (B) Decoding of *distance to object* information (most task-relevant). The horizontal dashed lines refer to chance-level decoding. Top panels: Decoding using correct trials; Bottom panels: Decoding using miss trials. In both top and bottom panels, the classifiers were trained on *correct* trials and tested on (left out) *correct* and all *miss* trials, respectively. Thick lines show the average across participants (shading 95% confidence intervals). Vertical dashed lines indicate critical events in the trial. Bayes Factors are shown in the bottom section of each graph: Filled circles show moderate/strong evidence for either hypothesis and empty circles indicate insufficient evidence. They show the results of Bayes factor analysis when evaluating the difference of the decoding values from chance for Active (blue) and Monitoring (red) conditions separately, the comparison of the two conditions (green) and the comparison of correct and miss trials (black). Note that for the comparison of correct and miss trials, Active and Monitoring conditions were averaged separately.
